# Supplementary material
Source: ML conference proceedings conference paper supplement (https://openreview.net/forum?id=KFxIsdIvUj)
Supplement: supplementary_material [file attachment]

---

# Identifiability and Generalizability from Multiple Experts in Inverse Reinforcement Learning

---

Anonymous Author(s)

Affiliation

Address

email

## Abstract

1 While Reinforcement Learning (RL) aims to train an agent from a reward function  
2 in a given environment, Inverse Reinforcement Learning (IRL) seeks to recover  
3 the reward function from observing an expert’s behavior. It is well known that, in  
4 general, various reward functions can lead to the same optimal policy, and hence,  
5 IRL is ill-defined. However, [1] showed that, if we observe two or more experts  
6 with different discount factors or acting in different environments, the reward  
7 function can under certain conditions be identified up to a constant. This work  
8 starts by showing an equivalent identifiability statement from multiple experts in  
9 tabular MDPs based on a rank condition, which is easily verifiable and is shown  
10 to be also necessary. We then extend our result to various different scenarios,  
11 i.e., we characterize reward identifiability in the case where the reward function  
12 can be represented as a linear combination of given features, making it more  
13 interpretable, or when we have access to approximate transition matrices. Even  
14 when the reward is not identifiable, we provide conditions characterizing when data  
15 on multiple experts in a given environment allows to generalize and train an optimal  
16 agent in a new environment. Our theoretical results on reward identifiability and  
17 generalizability are validated in various numerical experiments.

## 18 1 Introduction

19 Engineering a reward function in Reinforcement Learning can be troublesome in certain scenarios  
20 like driving [2], robotics [3], and economics/finance [4]. In economics and finance, the reward or  
21 objective/utility function of the agent are of fundamental importance but are not known a priori [5–8].  
22 In such cases, it may be easier to get demonstrations from an expert policy. Therefore, multiple  
23 algorithms have been developed to learn from demonstrations, e.g., in inverse reinforcement learning  
24 (IRL) and imitation learning (IL).

25 In IRL, the goal is to recover the reward function maximized by the agent, while in IL the expert  
26 demonstrations are used solely to learn a nearly optimal policy. In economics/finance, inference on  
27 the reward function is the focus of a large literature on estimation, testing, and policy analysis of  
28 structural models [9–11]. However, the reward function is often highly parameterized and represented  
29 by a low-dimensional set of parameters, or the literature focuses on estimating reduced-form causal  
30 relationships but not the true reward function [12, 13]. The attractiveness of IRL relies on the fact  
31 that the reward function is the most “succinct” representation of a task [14]. Indeed, identifying the  
32 reward function for each state-action pair allows generalizing the task to different transition dynamics  
33 and environments, which is not possible when using IL or highly parameterized structural models.

34 However, the IRL problem is unfortunately ill-posed since there always exist infinitely many reward  
35 functions for which the observed expert policy is optimal [15, 16]. The problem is known as reward  
36 shaping, and it is intuitively explained with the fact that, in the long term, the optimal policy is not

37 affected by inflating the reward in the current period and decreasing the one in the next. This difficulty  
38 originated a long debate on advantages and disadvantages of IL and IRL [17–20].

39 When multiple experts are available, differing in the transition matrices of the environments they  
40 each act in, and/or their discount factors, IRL can in certain cases infer the true reward function, up to  
41 a constant [21–23, 1]. Inspired by [1], we derive an equivalent necessary and sufficient condition on  
42 the expert environments, which is easily verifiable, ensuring that the true reward can be identified up  
43 to a constant shift. When this identifiability condition holds, the state-action dependent rewards can  
44 be recovered from expert demonstrations. We then derive identifiability results in various alternative  
45 scenarios, e.g., when we only have access to approximate transition matrices and, alternatively, when  
46 the reward function is known to be a linear combination of given features [24, 25].

47 However, full reward identifiability remains a strong requirement, and we provide a negative result of  
48 non-identifiability from any number of experts, in the presence of exogenous variables in the MDP.  
49 Nonetheless, even when the identifiability condition does not hold, the recovered reward function  
50 could still be used to train an optimal expert for a different environment. To this end, we characterize  
51 situations where observing multiple experts in given environments allows to train an optimal agent in  
52 a new environment.

## 53 2 Related work

54 Since its introduction in [15, 16], the IRL problem has been known to be ill-posed, since the  
55 observed expert policy can be optimal with respect to various reward functions. The set of reward  
56 transformations that preserve policy optimality are studied in [26, 16, 1, 27, 28]. [29] studied the  
57 unidentifiability related to suboptimal experts.

58 In this paper, we assume access to the optimal entropy regularized policies of multiple experts.  
59 Significant progress has been made to construct heuristics that select a single reward function  
60 from the set of IRL solutions (often called the feasible set), such as feature-based matching [30],  
61 maximum margin IRL [31], maximum causal entropy IRL [32, 33], maximum relative entropy IRL  
62 [34], Bayesian IRL [35–37], first-order optimality conditions [38, 39] or second-order optimality  
63 conditions [40, 41]. Popular IL algorithms implicitly select a feasible reward function via a convex  
64 reward regularizer [19, 42, 43] or using preference/ranking based algorithms [44, 45]. However, none  
65 of these approaches guarantee the identification of the true reward function.

66 The problem of identifiability in IRL has been investigated first in [21, 22] that study a setting where  
67 the learner can actively select optimal experts in multiple environments. The main result in [21, 22]  
68 is that interactively querying environments outputs a reward within a constant shift from the true  
69 one. The multiple experts setting has also been studied in [46] but in the context of value alignment  
70 verification where the aim is not to recover the reward function but rather verify that the value function  
71 of the agent is close to a target value. IRL from multiple MDPs also appears in [23] where the authors  
72 consider the problem of learning a reward function compatible with a dataset of demonstrations  
73 collected by multiple experts. In addition, [47] study structural conditions on the MDP for reward  
74 identification in the finite horizon setting and [48] study identifiability in linearly solvable MDPs.

75 Our work is inspired by [1]. Our first identifiability result provides an equivalent statement as their  
76 *value distinguishability* condition, but can be easily checked in practice, and allows to derive other  
77 identifiability results in alternative scenarios. Finally, we remark that the motivation for IRL is often  
78 predicting the expert behavior under new transitions dynamics [49, 50, 20]. We show that for this  
79 goal, it is not necessary to identify the exact reward, hence we give a condition on the observed  
80 experts’ environments and the test environment under which an optimal expert can be trained in the  
81 test environment. This perspective has also been taken in [51]. However, this work requires stronger  
82 assumptions on the transfer environment that we avoid in this paper, only requiring access to multiple  
83 experts. Moreover, our work contributes to AI safety [52–54] alleviating the *reward hacking* and  
84 *side effects* problems [53]. Indeed, by restricting the reward to linear combinations of a set of chosen  
85 features, we can provably recover an interpretable reward function inducing the optimal behavior,  
86 which is particularly desirable in medical applications [55, 56].

87 An important consideration for IRL comes from [57] that formalizes the fact that there exist tasks that  
88 can not be induced by optimizing a reward function. In this work and in IRL in general, we bypass  
89 this difficulty assuming that the expert is optimizing a reward function.

### 90 3 Preliminaries

91 A typical RL environment is characterised by a Markov Decision Process  $\mathcal{M} = \{\mathcal{S}, \mathcal{A}, T, \gamma, r, P_0\}$ ,  
 92 where  $\mathcal{S}, \mathcal{A}$  are the sets of states and actions respectively,  $T : \mathcal{S} \times \mathcal{A} \times \mathcal{S} \rightarrow [0, 1]$  is the state  
 93 transition probability, i.e.,  $T(s'|s, a)$  denotes the probability of arriving in state  $s'$  when taking action  
 94  $a$  in state  $s$ .  $R : \mathcal{S} \times \mathcal{A} \rightarrow \mathbb{R}$  denotes the reward function,  $\gamma$  the discount factor and  $P_0$  is the initial  
 95 state distribution. At each time step  $t$ , an agent observes the current state  $s_t \in \mathcal{S}$  and takes an action  
 96  $a_t \sim \pi(\cdot|s_t)$  where  $\pi$  is the agent's policy which determines a distribution over all actions in  $\mathcal{A}$   
 97 at every state. The agent gets a reward  $r_t = r(s_t, a_t)$  and transitions to a new state  $s_{t+1}$  sampled  
 98 according to the transition probability  $T$ .

99 An agent acting optimally in  $\mathcal{M}$  seeks to maximize its cumulative sum of rewards. In addition, we  
 100 assume that the agent seeks to diversify its possible actions, and hence that it maximizes the following  
 101 entropy regularized sum of discounted rewards:

$$V_\lambda^\pi(s) = \mathbb{E}_s^\pi \left[ \sum_{t=0}^{\infty} (\gamma^t (r(s_t, a_t) + \lambda \mathcal{H}(\pi(\cdot|s_t)))) \right], \quad (1)$$

102 where  $\mathbb{E}_s^\pi$  denotes the expectation over trajectories  $\{(s_t, a_t)\}_{t \geq 0}$  starting from state  $s_0 = s$  and  
 103 following policy  $\pi$  and  $\mathcal{H}(\pi) = -\sum_{a \in \mathcal{A}} \pi(a) \log \pi(a)$  is the entropy of  $\pi$ . The function  $V_\lambda^\pi$  is  
 104 called the (entropy regularized) value function of  $\pi$ .

105 In Inverse RL, the reward function  $r$  is unknown, but we observe an agent acting optimally with  
 106 respect to some reward function, and we wish to recover the reward function that the agent optimizes.  
 107 We now recall some results from [1].

108 **Theorem 1.** *For a fixed policy  $\pi(a|s) > 0$ , discount factor  $\gamma \in [0, 1)$ , and an arbitrary choice of*  
 109 *function  $v : \mathcal{S} \rightarrow \mathbb{R}$ , there is a unique corresponding reward function*

$$r(s, a) = \lambda \log \pi(a|s) - \gamma \sum_{s' \in \mathcal{S}} T(s'|s, a) v(s') + v(s)$$

110 *such that the MDP with reward  $r$  yields an entropy-regularized optimal policy  $\pi_\lambda^* = \pi$  and  $V_\lambda^\pi = v$ .*

111 By observing a single expert, it is hence possible to design a reward that yields any arbitrary value  
 112 function, and there are hence  $|\mathcal{S}|$  degrees of freedom remaining in the recovered reward function. An  
 113 idea explored in [1] is to assume that we observe two experts in two different MDPs with different  
 114 transition dynamics and discount rates, but acting optimally with respect to the same reward function.  
 115 The authors show that the reward can be identified up to a constant from observing the expert policies  
 116 provided that the MDPs of the experts satisfy the following *value-distinguishing* assumption.

117 **Definition 2.** *Consider a pair of Markov decision problems on the same state and action spaces,*  
 118 *but with respective discount rates  $\gamma_1, \gamma_2$  and transition probabilities  $T^1, T^2$ . We say that this pair is*  
 119 *value-distinguishing if, for any function  $v^1, v^2 : \mathcal{S} \rightarrow \mathbb{R}$ , the statement*

$$v^1(s) - \gamma_1 \sum_{s' \in \mathcal{S}} T^1(s'|s, a) v^1(s') = v^2(s) - \gamma_2 \sum_{s' \in \mathcal{S}} T^2(s'|s, a) v^2(s') \text{ for all } a \in \mathcal{A}, s \in \mathcal{S} \quad (2)$$

120 *implies at least one of  $v^1$  and  $v^2$  is a constant function.*

121 The way this assumption is stated makes it difficult to verify in practice, and the authors of [1] do not  
 122 attempt to verify it in their experiments.

### 123 4 Reward identification and generalization

124 In this section, we present our main theoretical results on reward identifiability and generalizability.  
 125 In the first part, we show an equivalent condition to Definition 2 for reward identification from two  
 126 experts (Theorem 3). The simplicity of our condition makes it easily verifiable and extendable to  
 127 various scenarios, in particular to the cases where we observe more than two experts (Corollary 5),  
 128 when the class of rewards is linearly parameterized with a set of given features (Theorem 7), or  
 129 when we have access to approximated transition matrices (Theorem 8). We also provide a negative

130 result on reward non-identifiability in MDPs with exogenous variables, which are common in many  
 131 real world scenarios. In the second part, we analyse reward generalizability. Here, we provide a  
 132 condition guaranteeing that a reward compatible with two experts leads to an optimal policy in a third  
 133 environment (Theorem 11). The proofs of the results are all postponed to Appendix A.

#### 134 4.1 Reward identifiability

135 Consider two Markov decision problems on the same set of states and actions  $\mathcal{S}$  and  $\mathcal{A}$  respectively,  
 136 but with different transition dynamics  $T^1, T^2$  and discount factors  $\gamma_1, \gamma_2$ . Let  $r \in \mathbb{R}^{|\mathcal{S}| \times |\mathcal{A}|}$  be the  
 137 reward function common to the two environments, and let  $v^1, v^2 \in \mathbb{R}^{|\mathcal{S}|}$  be the entropy regularized  
 138 values functions associated expert policies  $\pi^1$  and  $\pi^2$  in each environment respectively. According to  
 139 Theorem 1, we have that  $\forall (s, a) \in \mathcal{S} \times \mathcal{A}$ ,

$$\begin{aligned} r(s, a) &= \lambda \log \pi^1(a|s) - \gamma_1 \sum_{s' \in \mathcal{S}} T^1(s'|s, a) v^1(s') + v^1(s) \\ &= \lambda \log \pi^2(a|s) - \gamma_2 \sum_{s' \in \mathcal{S}} T^2(s'|s, a) v^2(s') + v^2(s). \end{aligned}$$

140 We hence deduce that  $\forall a \in \mathcal{A}$ ,

$$(I - \gamma_1 T_a^1 \quad -(I - \gamma_2 T_a^2)) \begin{pmatrix} v^1 \\ v^2 \end{pmatrix} = \lambda \log \pi^2(\cdot|a) - \lambda \log \pi^1(\cdot|a), \quad (3)$$

141 where  $\forall a \in \mathcal{A}$ ,  $T_a^i \in \mathbb{R}^{\mathcal{S} \times \mathcal{S}}$  is the transition matrix for action  $a$  and expert  $i = 1, 2$ , i.e.,  $T_a^i(s, s') =$   
 142  $T^i(s'|s, a)$ . By including all available actions to the experts, we can write

$$\begin{pmatrix} I - \gamma_1 T_{a_1}^1 & -(I - \gamma_2 T_{a_1}^2) \\ \vdots & \vdots \\ I - \gamma_1 T_{a_{|\mathcal{A}|}}^1 & -(I - \gamma_2 T_{a_{|\mathcal{A}|}}^2) \end{pmatrix} \begin{pmatrix} v^1 \\ v^2 \end{pmatrix} = \begin{pmatrix} \lambda \log \pi^2(\cdot|a_1) - \lambda \log \pi^1(\cdot|a_1) \\ \vdots \\ \lambda \log \pi^2(\cdot|a_{|\mathcal{A}|}) - \lambda \log \pi^1(\cdot|a_{|\mathcal{A}|}) \end{pmatrix}. \quad (4)$$

143 In order to identify a unique reward function, we need to identify a unique associated value function.  
 144 We hence want the linear system (4) to yield a unique solution, i.e., the  $|\mathcal{A}| |\mathcal{S}| \times 2 |\mathcal{S}|$  matrix on the left  
 145 hand side to be full rank, i.e., to have rank  $2 |\mathcal{S}|$ . However, it is well known that, for any MDP, adding  
 146 a constant to the reward would not change the associated optimal policy. Hence, there is an intrinsic  
 147 degree of freedom in reward identifiability which is impossible to get rid of from only observing  
 148 expert policies. In order to identify the reward up to a constant, we need this degree of freedom to be  
 149 the only one in the linear system (4), i.e., the associated matrix to have rank  $2 |\mathcal{S}| - 1$ . This result is  
 150 summarized in the following theorem, and its complete proof can be found in Appendix A.1.

151 **Theorem 3.** *Consider two Markov decision problems on the same set of states and actions, but with*  
 152 *different transition dynamics  $T_1, T_2$  and discount factors  $\gamma_1, \gamma_2$ . Suppose that we observe two experts*  
 153 *acting each in one of these environments, optimally with respect to the same reward function, in the*  
 154 *sense that their policies maximize the entropy regularized reward in their respective environments.*  
 155 *Then, the reward function can be recovered up to the addition of a constant if and only if*

$$\text{rank} \begin{pmatrix} I - \gamma_1 T_{a_1}^1 & I - \gamma_2 T_{a_1}^2 \\ \vdots & \vdots \\ I - \gamma_1 T_{a_{|\mathcal{A}|}}^1 & I - \gamma_2 T_{a_{|\mathcal{A}|}}^2 \end{pmatrix} = 2 |\mathcal{S}| - 1. \quad (5)$$

156 This condition turns out to be equivalent to Definition 2, as shown at the end of Appendix A.1, but is  
 157 stated in a way that is easier to check in practice and allows us to further characterize identifiability in  
 158 various scenarios. First of all, this result naturally extends to the case where we observe any number  
 159 of experts. We provide hereafter the result in the case of three experts.

160 **Corollary 4.** *Consider three Markov decision problems on the same set of states and actions, but*  
 161 *with different transition dynamics  $T_1, T_2, T_3$  and discount factors  $\gamma_1, \gamma_2, \gamma_3$ . Suppose that we observe*  
 162 *three experts acting each in one of these environments, optimally with respect to the same reward*

163 function. Then, the reward function can be recovered up to the addition of a constant if and only if

$$\text{rank} \begin{pmatrix} I - \gamma_1 T_{a_1}^1 & I - \gamma_2 T_{a_1}^2 & \mathbf{0} \\ \vdots & \vdots & \vdots \\ I - \gamma_1 T_{a_{|\mathcal{A}|}}^1 & I - \gamma_2 T_{a_{|\mathcal{A}|}}^2 & \mathbf{0} \\ I - \gamma_1 T_{a_1}^1 & \mathbf{0} & I - \gamma_3 T_{a_1}^3 \\ \vdots & \vdots & \vdots \\ I - \gamma_1 T_{a_{|\mathcal{A}|}}^1 & \mathbf{0} & I - \gamma_3 T_{a_{|\mathcal{A}|}}^3 \end{pmatrix} = 3|\mathcal{S}| - 1. \quad (6)$$

164 An interesting scenario is the one where the two experts act in the same environment, and only the  
165 discount rate is varied.

166 **Corollary 5.** Consider two Markov decision problems on the same set of states and actions, with  
167 the same transition matrix  $T$  and reward function but different discount factors  $\gamma_1 \neq \gamma_2$ . Then, the  
168 reward function is identifiable up to a constant by observing two experts in  $(T, \gamma_1), (T, \gamma_2)$  iff

$$\text{rank} \begin{pmatrix} T_{a_1} - T_{a_2} \\ \vdots \\ T_{a_1} - T_{a_{|\mathcal{A}|}} \end{pmatrix} = |\mathcal{S}| - 1. \quad (7)$$

169 **Remark 1.** Interestingly, condition (7) is equivalent to the condition for identification of a action-  
170 independent reward from a single expert, assuming such a reward exists ([1], Corollary 3).

171 Next, we provide a negative result concerning MDPs with exogenous variables, i.e., a variable whose  
172 dynamics are independent of the agent's action. This MDP class is common in economics/finance  
173 and has been studied in many real world scenarios including inventory control problems [58],  
174 variable weather conditions and customer demands [59], wildfire management [60], and stock market  
175 fluctuations [61]. We also provide examples involving such variables in the experimental section.

176 **Corollary 6.** Suppose that the state space is constructed as a set of variables each taking a finite  
177 number of values, i.e.,  $\mathcal{S} = \{s \in \mathbb{R}^d : s_i \in \mathcal{S}_i\}$ . The transition matrices for each action  $a$  can be  
178 defined by specifying the evolution of each state variable  $s_i^{t+1}$  depending on  $(s^t, a)$ . Suppose that  
179 there exists a state variable whose evolution only depends on its previous value, but neither on the  
180 other state variables nor the action taken: such a variable is called an **exogenous** variable. Note  
181 that this variable can still affect the evolution of all other variables, and its evolution can vary across  
182 the environment of the observed experts. Then, the reward function is **not** identifiable (even up to a  
183 constant) using any number of experts.

184 Such a negative result motivates the search for milder requirements than arbitrary reward identification,  
185 which is too hard of a goal to achieve in certain scenarios.

186 A possible way to improve reward identifiability is to restrict the class of possible rewards, e.g.,  
187 by constraining it to be a linear combination of a set of chosen features. This is known as Feature  
188 matching IRL [49, 62–65]. The smaller the set of features, the easier to identify the reward, as  
189 described in the following theorem. This method also allows to recover a more interpretable reward  
190 function, since the recovered parameters are associated with specific features.

191 **Theorem 7.** Suppose that we restrict the class of possible reward functions to the one parameterized  
192 as  $r_\theta(s, a) = \theta^T f_{s,a} \forall a \in \mathcal{A}, s \in \mathcal{S}$  where  $f : \mathcal{S} \times \mathcal{A} \rightarrow \mathbb{R}^d$  is a given feature function, and  $\theta \in \mathbb{R}^d$   
193 denotes the reward parameters. Suppose that the  $d$  chosen features are linearly independent, i.e., that

194  $f_{s,a}^T v = 0 \forall s, a \Rightarrow v = 0$ . Then, if  $\mathbf{1} \in \text{Im} \begin{pmatrix} f_{a_1} \\ \vdots \\ f_{a_{|\mathcal{A}|}} \end{pmatrix}$ , the reward is identifiable up to constant by

195 observing experts acting in  $(T^1, \gamma_1), (T^2, \gamma_2)$  if and only if

$$\text{rank} \begin{pmatrix} I - \gamma_1 T_{a_1}^1 & I - \gamma_2 T_{a_1}^2 & \mathbf{0} \\ \vdots & \vdots & \vdots \\ I - \gamma_1 T_{a_{|\mathcal{A}|}}^1 & I - \gamma_2 T_{a_{|\mathcal{A}|}}^2 & \mathbf{0} \\ I - \gamma_1 T_{a_1}^1 & \mathbf{0} & f_{a_1} \\ \vdots & \vdots & \vdots \\ I - \gamma_1 T_{a_{|\mathcal{A}|}}^1 & \mathbf{0} & f_{a_{|\mathcal{A}|}} \end{pmatrix} = 2|\mathcal{S}| + d - 1. \quad (8)$$

where  $f_a = (f_{s_1,a} \dots f_{s_{|\mathcal{S}|},a})^T \in \mathbb{R}^{|\mathcal{S}| \times d}$ . On the other hand, if  $\mathbf{1} \notin \text{Im} \begin{pmatrix} f_{a_1} \\ \vdots \\ f_{a_{|\mathcal{A}|}} \end{pmatrix}$ , then the reward can be exactly recovered provided that the rank of the matrix on the left hand side of equation (8), which augments equation (5) by the features being matched, is  $2|\mathcal{S}| + d$ .

Finally, it usually happens that the exact transition matrices  $\{T_a\}_{a \in \mathcal{A}}$  are not known exactly and must be estimated, e.g., from samples. Verifying condition (5) on the approximated matrices may be misleading since the rank is very sensitive to small perturbations. Hence, we provide hereafter an identifiability condition in the case where we only have access to approximated transition matrices.

**Theorem 8.** Suppose that we approximate the transition matrices  $\{T_a^i\}_{a \in \mathcal{A}}$  as  $\{\hat{T}_a^i\}_{a \in \mathcal{A}}$  such that  $\|T_a^i - \hat{T}_a^i\|_2 \leq \epsilon \forall a \in \mathcal{A}, i = 1, 2$ . Suppose that we verify condition (5) using the approximated matrices, i.e., we compute the second smallest eigenvalue  $\sigma$  of the following matrix:

$$\begin{pmatrix} I - \gamma_1 \hat{T}_{a_1}^1 & I - \gamma_2 \hat{T}_{a_1}^2 \\ \vdots & \vdots \\ I - \gamma_1 \hat{T}_{a_{|\mathcal{A}|}}^1 & I - \gamma_2 \hat{T}_{a_{|\mathcal{A}|}}^2 \end{pmatrix}. \quad (9)$$

Then, condition (5) on the true transition matrices  $\{T_a\}_{a \in \mathcal{A}}$  holds provided that

$$\sigma > \epsilon \sqrt{2|\mathcal{A}|} \max(\gamma_1, \gamma_2). \quad (10)$$

**Remark 2.** The matrix estimator  $\hat{T}_a$  can be obtained from samples. For example, [66][Lemma 5] shows that a high probability bound on the max norm  $\|T_a - \hat{T}_a\|_{\max} \leq \epsilon$  requires  $\mathcal{O}(\epsilon^{-4})$  samples from a generative model [67]. This would imply the following bound on the spectral norm:  $\|T_a - \hat{T}_a\|_2 \leq |\mathcal{S}| \|T_a - \hat{T}_a\|_{\max} \leq |\mathcal{S}| \epsilon$ . However, the dependence on  $\epsilon$  can be improved as we show next applying the matrix Bernstein bound [68, 69].

**Theorem 9.** Let  $\hat{T}_a$  be the empirical estimator for  $T_a$ . Then with probability greater than  $1 - \delta$ ,

$$\|T_a - \hat{T}_a\|_2 \leq |\mathcal{S}| \sqrt{\frac{\log \frac{|\mathcal{S}||\mathcal{A}|}{\delta}}{2N}} + \frac{2(|\mathcal{S}| + 1) \log \frac{|\mathcal{S}||\mathcal{A}|}{\delta}}{3N} \quad \forall a \in \mathcal{A}. \quad (11)$$

Therefore, we can obtain  $\|T_a - \hat{T}_a\|_2 \leq \epsilon$  with  $\mathcal{O}(\epsilon^{-2})$  samples.

## 4.2 Generalization to unknown environments

We now focus on reward generalizability, i.e., the ability to recover a reward function that would allow us to train an optimal policy in a new environment. Suppose that we recover a reward function that is compatible with two experts acting in two MDPs  $\mathcal{M}_1, \mathcal{M}_2$ , and that we use this reward to train an expert in a third environment  $\mathcal{M}_3$ , assuming all environments share the same true reward function but possibly different transition dynamics and discount factors. What condition guarantees that the trained expert will be optimal in  $\mathcal{M}_3$ ?

This generalization requirement is milder than full reward identification. Indeed, being able to identify the reward (even up to a constant) naturally allows to train an optimal policy in any other environment sharing the same reward. However, even in the presence of non-trivial degrees of freedom, it may be the case that any recovered reward suffices to train an optimal policy in a given other environment.

Intuitively, the third training environment should not vary too much from the observed environments  $\mathcal{M}_1, \mathcal{M}_2$ . More precisely, if observing a third expert in environment 3 does not provide any further identification of the reward than with environments 1 and 2, then any reward compatible with environments 1 and 2 leads to an optimal policy in environment 3. The condition is made precise in the following theorem.

**Definition 10.** Consider three Markov decision problems on the same set of states and actions, but with different transition matrices  $T_1, T_2, T_3$  and discount factors  $\gamma_1, \gamma_2, \gamma_3$ . Suppose that we observe two optimal entropy regularized experts with respect to the same reward function in environments 1 and 2. We say that  $(T^1, \gamma_1), (T^2, \gamma_2)$  **generalize to**  $(T^3, \gamma_3)$  if any reward compatible with the two

experts in environments 1 and 2 leads to an optimal expert in environment 3. The definition naturally extends to more than two observed experts.

**Theorem 11.**  $(T^1, \gamma_1), (T^2, \gamma_2)$  generalize to  $(T^3, \gamma_3)$  if and only if

$$\text{rank} \begin{pmatrix} I - \gamma_1 T_{a_1}^1 & I - \gamma_2 T_{a_1}^2 \\ \vdots & \vdots \\ I - \gamma_1 T_{a_{|\mathcal{A}|}}^1 & I - \gamma_2 T_{a_{|\mathcal{A}|}}^2 \end{pmatrix} = \text{rank} \begin{pmatrix} I - \gamma_1 T_{a_1}^1 & I - \gamma_2 T_{a_1}^2 & \mathbf{0} \\ \vdots & \vdots & \vdots \\ I - \gamma_1 T_{a_{|\mathcal{A}|}}^1 & I - \gamma_2 T_{a_{|\mathcal{A}|}}^2 & \mathbf{0} \\ I - \gamma_1 T_{a_1}^1 & \mathbf{0} & I - \gamma_3 T_{a_1}^3 \\ \vdots & \vdots & \vdots \\ I - \gamma_1 T_{a_{|\mathcal{A}|}}^1 & \mathbf{0} & I - \gamma_3 T_{a_{|\mathcal{A}|}}^3 \end{pmatrix} - |\mathcal{S}|. \quad (12)$$

This condition is also necessary, in the sense that, if it does not hold, then there exists a reward function compatible with experts 1 and 2 but which leads to a sub-optimal policy in environment 3.

One interesting question is whether observing two experts in the same environment with different discount factors allows to generalize to any other expert with arbitrary discount factor. It turns out to be the case under some commutativity constraint on the transition matrices.

**Corollary 12.** Consider a single environment with transitions  $T$ . Suppose that there exists an action  $a_0 \in \mathcal{A}$  such that  $T_{a_0}$  commutes with  $T_a$  for all  $a \in \mathcal{A}$ . Then for any  $0 < \gamma_1, \gamma_2, \gamma_3 < 1$  with  $\gamma_1 \neq \gamma_2$ ,  $(T, \gamma_1), (T, \gamma_2)$  generalize to  $(T, \gamma_3)$ .

**Remark 3.** The commutativity condition cannot simply be removed. Indeed, we provide in Appendix A.9 an example with two actions with non-commutative transition matrices for which condition (12) is not satisfied.

## 5 Experiments

We now present empirical validations of our claims. In particular, we verify the identifiability requirement given by Theorem 3 in the context of randomly generated transition matrices and different gridworlds with uniform additive noise in the dynamics.

In addition, we study a Windy-Gridworld and a financial model that we term Strebulaeu-Whited both involving exogenous variables in their state spaces. In agreement with Corollary 6, the reward function is not identifiable in these environments, highlighting the necessity of imposing milder requirements than full reward recovery. For example, in Windy-Gridworld, we show that by observing multiple experts acting in environments with different wind distributions, we can generalize, i.e., train an optimal expert in environments with arbitrary other wind distribution, in accordance with Theorem 11. On the other hand, in Strebulaeu-Whited, given the additional information that the reward function can be represented as a linear combination of some known features, we can identify the reward, validating the condition of Theorem 7. The algorithms are described in Appendix B.

### 5.1 Identifiability experiments

**Experiments on Random-Matrices** The first experiment involves randomly generated transition matrices and reward function with  $|\mathcal{S}| = 18, |\mathcal{A}| = 5$ . This setting matches the numerical evidence in [1]. Their algorithm recovers the reward function but the connection with their theoretical contribution is not highlighted. On the contrary, we have no theory practice mismatch, since we verify exactly the condition in Theorem 3. In particular, for the 100 random seed we tried the rank of the matrix  $A$  is  $2|\mathcal{S}| - 1 = 35$ , then invoking Theorem 3 we can conclude that the reward function is identifiable up to a constant shift. We provide a visual example of the recovered reward in Figure 4 in Appendix C.

**Experiments on Gridworld** As a second example of identifiability, we consider Gridworld, where the state space is a squared grid with 100 states while the action set is given by  $\mathcal{A} = \{\text{up, down, left, right}\}$  with dynamics given by  $T_\alpha(s'|s, a) = (1 - \alpha)T_{\text{det}}(s'|s, a) + \alpha U(s'|s, a)$  where  $T_{\text{det}}(s'|s, a)$  represents deterministic transition dynamics where for example the action right leads to the state on the right with probability 1. If an action would lead outside the grid, then the agent

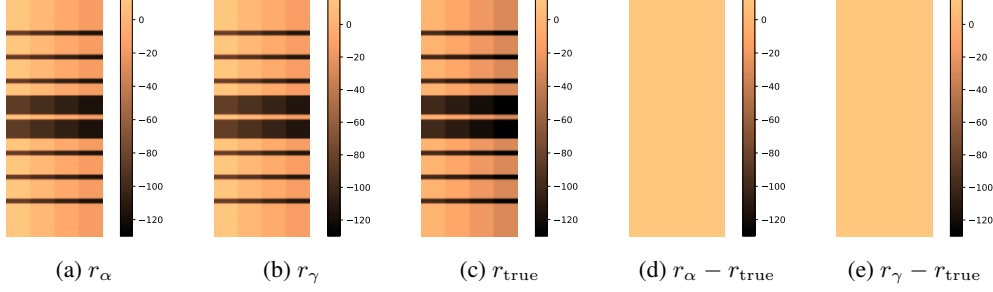

Figure 1: Comparison between true and recovered reward in Gridworld with an action dependent reward,  $|S| = 100$ . It can be noticed that the reward function  $r_\gamma$  recovered changing discount factors is within a constant shift from the true reward (subplots (b),(e)). The same conclusion holds for  $r_\alpha$  recovered from different  $\alpha$  (see subplots (a),(d)).

stays in the current state with probability 1. The dynamics  $U(s'|s, a)$  are instead uniform over the states that are first adjacent to the current state. In other words,  $U(\cdot|s, a) = \text{Unif}(\mathcal{N}(s)) \quad \forall a \in \mathcal{A}$  where  $\mathcal{N}(s)$  denotes the set of first neighbors of the state  $s$ .

We generate two different environments changing the value of  $\alpha$ , choosing  $\alpha^1 = 0.4$  and  $\alpha^2 = 0.2$ . We notice that, even using the same discount factor  $\gamma = 0.9$ , the condition of Theorem 3 holds. When  $\alpha$  is kept fixed, we also notice that the condition of Corollary 5 holds, and hence the reward can be recovered by just varying the discount factor  $\gamma$  of the experts. We numerically verify that the reward can indeed be identified up to a constant shift in these two settings (see Figure 1).

## 5.2 Generalizability experiments

In this section, we present cases where identifiability is not possible due to the presence of exogenous variables. However, we notice that the generalizability condition in Theorem 11 is often satisfied, even for a test environment with parameters rather different than the environments of the observed experts. We start briefly describing the environments to later comment on the results.

**Experiments on WindyGridworld** The WindyGridworld environment augments the Gridworld state representation by including a wind direction. The wind impacts the position transitions by making the agent move one step in the direction of the wind in addition to the action taken. The wind directions at step  $t$ ,  $w_t$  are sampled i.i.d. from the distribution  $P_{\text{wind}}$ , and is hence an exogenous variable. While the reward is not identifiable whatever the number of experts, we can generalize to a new environment with an arbitrary wind distribution by observing enough experts in environments with different wind distributions.

In Figure 2b, we see that we can obtain better identifiability (although never full identifiability) when increasing the number of experts. Once we have observed 4 experts, we do not get further identifiability by observing more experts, hence leading to generalizability as shown in Figure 2a and Figure 3. We conjecture that this number of experts is linked to the number of values that the exogenous variable, i.e. the wind direction, can take.

Furthermore, although the actions in Gridworld do not exactly commute (because of the boundary), observing two experts in the same environment with different discount factors enables generalizing to a different discount factor (see Figure 6 in Appendix C). The condition of Corollary 12 is hence sufficient but not necessary.

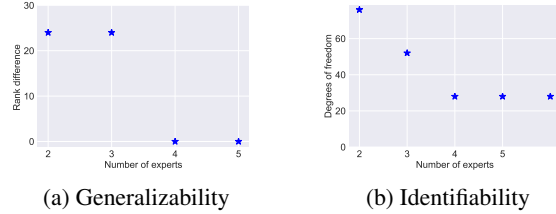

Figure 2: Figure 2a shows the difference between right and left term of Theorem 11. Figure 2b shows the difference between columns and rank of the matrix in Theorem 3. We have identifiability or generalizability respectively when those values are 0.



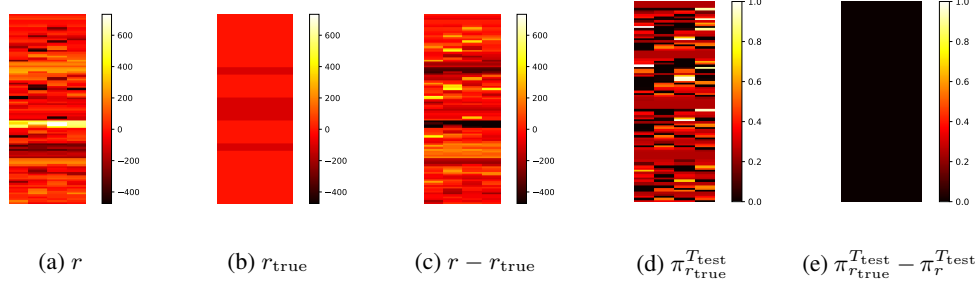

Figure 3: Comparison between true and recovered reward ( $r$  and  $r_{\text{true}}$ ) from 4 experts in WindyGridworld with  $|\mathcal{S}| = 400$ . We notice that the reward function is not identified (see (a), (b), (c)). However, when we use the recovered reward in subplot (a) to train an optimal policy under unseen dynamics we recover the optimal policy under the true reward in subplot (b). The subplot (d) shows the policy  $\pi_{r_{\text{true}}}^{T_{\text{test}}}$  recovered from the true reward in a new environment  $T_{\text{test}}$  and (e) shows the difference between the policy recovered from  $r_{\text{true}}$  and from the recovered reward denoted as  $\pi_r^{T_{\text{test}}}$ .

**Experiments on Strebulae-Whited** The Strebulae-Whited environment is the neoclassical investment model in which a firm has a Cobb-Douglas production function with decreasing returns to scale, as in [70]. The goal of the agent is to maximize profits discounted at constant rate  $0 < \beta < 1$ . The state of the agent is defined by the capital level  $k \geq 0$  and an exogenously given persistent stochastic productivity shock  $z$ . We can summarize the state by  $s = (k, z)$ . The next state  $s' = (k', z')$  is determined separately for  $k'$  and  $z'$ . We have that  $k' = (1 - \delta)k + a$ , where  $\delta$  is the depreciation rate of physical capital and  $a$  is today's investment which is the action in the model. The variable  $z'$  evolves according to  $\ln z' = \rho \ln z + \epsilon$  where  $\epsilon \sim N(0, \sigma_\epsilon)$ .

The continuous variable  $k$  and  $z$  are discretized according to the scheme proposed in [71]. Hence, we obtain a discrete process with  $K^2$  possible values for the state variable  $s = (k, z)$  (so  $|\mathcal{S}| = K^2$ ) and  $K$  values for the action  $a$ . In the experiments in Figure 7 in Appendix C, we choose  $K = 20$  and consider two environments with different values of  $\sigma_\epsilon$  set to 0.02 and 0.04, respectively. We observe that the rank of the identifiability matrix is 552. Since  $552 < 2|\mathcal{S}| - 1 = 799$ , the reward function is not identifiable up to a constant as expected in MDPs with exogenous states. Nonetheless, when we consider a third environment with  $\sigma_\epsilon = 0.6$ , the generalizability condition in Theorem 11 is satisfied. Hence, the expert behavior can be predicted in the third environment (see Figure 7e in Appendix C).

### 5.3 Identifiability experiments with a restricted reward class

The final result presents a numerical validation of Theorem 7 in the environment Strebulae-Whited with exogenous state variable. In this model, the true reward function can be expressed as a linear combination of the three features given by  $f_{s,a} = [z((1 - \delta)k + a)^\rho, (1 - \delta)k, ((1 - \delta)k + a)]^T$ , where  $s = (k, z)$  and the parameter  $\rho \in (0, 1)$  captures the curvature of the production function. We set  $\rho = 0.55$ . The first feature corresponds to the firm's output or sales which is available from the firm's income statement, the second feature is the firm's current capital stock net of depreciation which is available from the balance sheet, and the third feature is the firm's future capital stock after adding investment which is available from the cash flow statement. The true reward function can be written as  $r(s, a) = \theta^T f_{s,a}$  with  $\theta = [1, 1, -1]^T$ . It can be interpreted as follows: the agent's reward of investment is an increase in output/sales,  $\theta_1 = 1 > 0$ , while the cost of capital is 1 and, hence, investment is costly,  $\theta_3 = -1 < 0$ . At the same time, the capital stock is valuable and can be liquidated at a price of  $\theta_2 = 1 > 0$ .

Knowing these features, we can verify that the rank of the matrix in Equation (8), is 803 which is equal to  $2|\mathcal{S}| + d$  in this environment ( $|\mathcal{S}| = 400$  and  $d = 3$ ). Invoking Theorem 7, we can conclude that the reward function is identifiable exactly, which is verified numerically in Figure 8 in Appendix C. Expressing the reward in terms of features hence helps identifiability and interpretability.

## References

- [1] Haoyang Cao, Samuel Cohen, and Lukasz Szpruch. Identifiability in inverse reinforcement learning. *Advances in Neural Information Processing Systems*, 34, 2021.

- [2] W. Bradley Knox, Alessandro Allievi, Holger Banzhaf, Felix Schmitt, and Peter Stone. Reward (mis)design for autonomous driving, 2021.
- [3] T Osa, J Pajarinen, G Neumann, JA Bagnell, P Abbeel, and J Peters. An algorithmic perspective on imitation learning. *Foundations and Trends in Robotics*, 2018.
- [4] Arthur Charpentier, Romuald Elie, and Carl Remlinger. Reinforcement learning in economics and finance, 2020.
- [5] J. von Neumann and O. Morgenstern. *Theory of games and economic behavior*. Princeton University Press, 1947.
- [6] John W. Pratt. Risk aversion in the small and in the large. *Econometrica*, 32(1/2):122–136, 1964.
- [7] Kenneth Joseph Arrow. *Aspects of the theory of risk-bearing*. Helsinki: Yrjo Jahnsanian Sa tio, 1965.
- [8] Daniel Kahneman and Amos Tversky. Prospect theory: An analysis of decision under risk. *Econometrica*, 47(2):263–291, 1979.
- [9] Lars Peter Hansen. Large sample properties of generalized method of moments estimators. *Econometrica*, 50(4):1029–1054, 1982.
- [10] John Rust. Optimal replacement of gmc bus engines: An empirical model of harold zurcher. *Econometrica*, 55(5):999–1033, 1987.
- [11] V. Joseph Hotz and Robert A. Miller. Conditional choice probabilities and the estimation of dynamic models. *The Review of Economic Studies*, 60(3):497–529, 1993.
- [12] James J. Heckman. Sample selection bias as a specification error. *Econometrica*, 47(1):153–161, 1979.
- [13] Joshua D. Angrist, Guido W. Imbens, and Donald B. Rubin. Identification of causal effects using instrumental variables. *Journal of the American Statistical Association*, 91(434):444–455, 1996.
- [14] R. S. Sutton and A. G. Barto. *Introduction to Reinforcement Learning*. MIT Press, 1st edition, 1998.
- [15] Stuart Russell. Learning agents for uncertain environments (extended abstract). In *Annual Conference on Computational Learning Theory (COLT)*, 1998.
- [16] A. Y. Ng and S. J. Russell. Algorithms for inverse reinforcement learning. In *International Conference on Machine Learning (ICML)*, 2000.
- [17] Bilal Piot, Matthieu Geist, and Olivier Pietquin. Learning from demonstrations: Is it worth estimating a reward function? In *Joint European Conference on Machine Learning and Knowledge Discovery in Databases*, pages 17–32. Springer, 2013.
- [18] Bilal Piot, Matthieu Geist, and Olivier Pietquin. Bridging the gap between imitation learning and inverse reinforcement learning. *IEEE transactions on neural networks and learning systems*, 28(8):1814–1826, 2016.
- [19] J. Ho, J. K. Gupta, and S. Ermon. Model-free imitation learning with policy optimization. In *International Conference on Machine Learning (ICML)*, 2016.
- [20] Justin Fu, Katie Luo, and Sergey Levine. Learning robust rewards with adversarial inverse reinforcement learning. In *International Conference on Learning Representations (ICLR)*, 2018.
- [21] Kareem Amin and Satinder Singh. Towards resolving unidentifiability in inverse reinforcement learning, 2016.
- [22] Kareem Amin, Nan Jiang, and Satinder Singh. Repeated inverse reinforcement learning, 2017.

- [23] Amarildo Likmeta, Alberto Maria Metelli, Giorgia Ramponi, Andrea Tirinzoni, Matteo Giuliani, and Marcello Restelli. Dealing with multiple experts and non-stationarity in inverse reinforcement learning: an application to real-life problems. *Machine Learning*, 110(9):2541–2576, 2021.
- [24] Rati Devidze, Goran Radanovic, Parameswaran Kamalaruban, and Adish Singla. Explicable reward design for reinforcement learning agents. *Advances in Neural Information Processing Systems*, 34, 2021.
- [25] Daniel Jarrett, Ioana Bica, and Mihaela van der Schaar. Strictly batch imitation learning by energy-based distribution matching, 2021.
- [26] Andrew Y Ng, Daishi Harada, and Stuart Russell. Policy invariance under reward transformations: Theory and application to reward shaping.
- [27] Joar Skalse, Matthew Farrugia-Roberts, Stuart Russell, Alessandro Abate, and Adam Gleave. Invariance in policy optimisation and partial identifiability in reward learning, 2022.
- [28] Adam Gleave, Michael Dennis, Shane Legg, Stuart Russell, and Jan Leike. Quantifying differences in reward functions, 2020.
- [29] Stuart Armstrong and Sören Mindermann. Occam’s razor is insufficient to infer the preferences of irrational agents. In S. Bengio, H. Wallach, H. Larochelle, K. Grauman, N. Cesa-Bianchi, and R. Garnett, editors, *Advances in Neural Information Processing Systems*, volume 31. Curran Associates, Inc., 2018.
- [30] P. Abbeel and A. Y. Ng. Apprenticeship learning via inverse reinforcement learning. In *International Conference on Machine Learning (ICML)*, 2004.
- [31] N. D. Ratliff, J. A. Bagnell, and M. A. Zinkevich. Maximum margin planning. In *International Conference on Machine Learning (ICML)*, 2006.
- [32] B. D. Ziebart, A. Maas, J. A. Bagnell, and A. K. Dey. Maximum entropy inverse reinforcement learning. In *National Conference on Artificial Intelligence (AAAI)*, 2008.
- [33] Brian D Ziebart. *Modeling purposeful adaptive behavior with the principle of maximum causal entropy*. PhD thesis, Carnegie Mellon University, 2010.
- [34] Abdeslam Boularias, Jens Kober, and Jan Peters. Relative entropy inverse reinforcement learning. In *Proc. Intl Conf. on Artificial Intelligence and Statistics (AISTATS)*, 2011.
- [35] Sreejith Balakrishnan, Quoc Phong Nguyen, Bryan Kian Hsiang Low, and Harold Soh. Efficient exploration of reward functions in inverse reinforcement learning via bayesian optimization, 2020.
- [36] D. Ramachandran and E. Amir. Bayesian inverse reinforcement learning. In *International Joint Conference on Artificial Intelligence (IJCAI)*, 2007.
- [37] Daniel S. Brown, Russell Coleman, Ravi Srinivasan, and Scott Niekum. Safe imitation learning via fast bayesian reward inference from preferences, 2020.
- [38] Matteo Pirotta and Marcello Restelli. Inverse reinforcement learning through policy gradient minimization. *Proceedings of the AAAI Conference on Artificial Intelligence*, 30(1), Mar. 2016.
- [39] Giorgia Ramponi, Gianluca Drappo, and Marcello Restelli. Inverse reinforcement learning from a gradient-based learner. 2020.
- [40] Rakhoon Hwang, Hanjin Lee, and Hyung Ju Hwang. Option compatible reward inverse reinforcement learning. *Pattern Recognition Letters*, 154:83–89, 2022.
- [41] Alberto Maria Metelli, Matteo Pirotta, and Marcello Restelli. Compatible reward inverse reinforcement learning. In I. Guyon, U. Von Luxburg, S. Bengio, H. Wallach, R. Fergus, S. Vishwanathan, and R. Garnett, editors, *Advances in Neural Information Processing Systems*, volume 30. Curran Associates, Inc., 2017.

- 437 [42] Tanmay Gangwani and Jian Peng. State-only imitation with transition dynamics mismatch. In  
438 *Proc. Intl Conf. on Learning Representations (ICLR)*, 2020.
- 439 [43] Faraz Torabi, Garrett Warnell, and Peter Stone. Generative adversarial imitation from observa-  
440 tion. *arXiv preprint arXiv:1807.06158*, 2018.
- 441 [44] Daniel S. Brown, Wonjoon Goo, Prabhat Nagarajan, and Scott Niekum. Extrapolating beyond  
442 suboptimal demonstrations via inverse reinforcement learning from observations, 2019.
- 443 [45] Daniel S. Brown, Wonjoon Goo, and Scott Niekum. Better-than-demonstrator imitation learning  
444 via automatically-ranked demonstrations. In Leslie Pack Kaelbling, Danica Kragic, and Komei  
445 Sugiura, editors, *Proceedings of the Conference on Robot Learning*, volume 100 of *Proceedings*  
446 *of Machine Learning Research*, pages 330–359. PMLR, 30 Oct–01 Nov 2020.
- 447 [46] Daniel S Brown, Jordan Schneider, Anca Dragan, and Scott Niekum. Value alignment ver-  
448 ification. In Marina Meila and Tong Zhang, editors, *Proceedings of the 38th International*  
449 *Conference on Machine Learning*, volume 139 of *Proceedings of Machine Learning Research*,  
450 pages 1105–1115. PMLR, 18–24 Jul 2021.
- 451 [47] Kuno Kim, Shivam Garg, Kirankumar Shiragur, and Stefano Ermon. Reward identification in  
452 inverse reinforcement learning. In Marina Meila and Tong Zhang, editors, *Proceedings of the*  
453 *38th International Conference on Machine Learning*, volume 139 of *Proceedings of Machine*  
454 *Learning Research*, pages 5496–5505. PMLR, 18–24 Jul 2021.
- 455 [48] K. Dvijotham and E. Todorov. Inverse optimal control with linearly-solvable MDPs. In  
456 *International Conference on Machine Learning (ICML)*, 2010.
- 457 [49] Pieter Abbeel and Andrew Y Ng. Apprenticeship learning via inverse reinforcement learning.  
458 In *Proc. Intl Conf. on Machine Learning (ICML)*, 2004.
- 459 [50] S. Levine, Z. Popović, and V. Koltun. Nonlinear inverse reinforcement learning with Gaussian  
460 processes. In *Advances in Neural Information Processing Systems (NeurIPS)*, 2011.
- 461 [51] Alberto Maria Metelli, Giorgia Ramponi, Alessandro Concetti, and Marcello Restelli. Provably  
462 efficient learning of transferable rewards. In *International Conference on Machine Learning*,  
463 pages 7665–7676. PMLR, 2021.
- 464 [52] Tom Everitt and Marcus Hutter. Avoiding wireheading with value reinforcement learning. In  
465 *International Conference on Artificial General Intelligence*, pages 12–22. Springer, 2016.
- 466 [53] Dario Amodei, Chris Olah, Jacob Steinhardt, Paul Christiano, John Schulman, and Dan Mané.  
467 Concrete problems in ai safety, 2016.
- 468 [54] Jan Leike, David Krueger, Tom Everitt, Miljan Martic, Vishal Maini, and Shane Legg. Scalable  
469 agent alignment via reward modeling: a research direction, 2018.
- 470 [55] Srivatsan Srinivasan and Finale Doshi-Velez. Interpretable batch irl to extract clinician goals in  
471 icu hypotension management. *AMIA Summits on Translational Science Proceedings*, 2020:636,  
472 2020.
- 473 [56] Daniel Jarrett, Alihan Hüyük, and Mihaela Van Der Schaar. Inverse decision modeling: Learning  
474 interpretable representations of behavior. In *International Conference on Machine Learning*,  
475 pages 4755–4771. PMLR, 2021.
- 476 [57] David Abel, Will Dabney, Anna Harutyunyan, Mark K Ho, Michael Littman, Doina Precup,  
477 and Satinder Singh. On the expressivity of markov reward. In M. Ranzato, A. Beygelzimer,  
478 Y. Dauphin, P.S. Liang, and J. Wortman Vaughan, editors, *Advances in Neural Information*  
479 *Processing Systems*, volume 34, pages 7799–7812. Curran Associates, Inc., 2021.
- 480 [58] S. Joshi, R. Khardon, P. Tadepalli, A. Raghavan, and A. Fern. Solving relational mdps with  
481 exogenous events and additive rewards, 2013.
- 482 [59] Thomas G. Dietterich, George Trimponias, and Zhitang Chen. Discovering and removing  
483 exogenous state variables and rewards for reinforcement learning, 2018.

- [60] Sean McGregor, Rachel Houtman, Claire Montgomery, Ronald Metoyer, and Thomas G. Dietterich. Factoring exogenous state for model-free monte carlo, 2017.
- [61] Vincent Liu, James Wright, and Martha White. Exploiting action impact regularity and exogenous state variables for offline reinforcement learning, 2021.
- [62] Andrew Y Ng and Stuart Russell. Algorithms for inverse reinforcement learning. In *Proc. Intl Conf. on Machine Learning (ICML)*, 2000.
- [63] Nathan D Ratliff, J Andrew Bagnell, and Martin A Zinkevich. Maximum margin planning. In *Proc. Intl Conf. on Machine Learning (ICML)*, 2006.
- [64] U. Syed, M. Bowling, and R.E. Schapire. Apprenticeship learning using linear programming. In *International Conference on Machine Learning (ICML)*, 2008.
- [65] Eric Heim. A practitioner’s guide to maximum causal entropy inverse reinforcement learning, starting from markov decision processes. Technical report, CARNEGIE-MELLON UNIV PITTSBURGH PA PITTSBURGH United States, 2019.
- [66] Michael Kearns. Near-optimal reinforcement learning in polynomial time. In *Machine Learning*, pages 260–268. Morgan Kaufmann, 1998.
- [67] Mohammad Gheshlaghi Azar, Remi Munos, and Bert Kappen. On the sample complexity of reinforcement learning with a generative model, 2012.
- [68] Daniel Hsu, Sham M. Kakade, and Tong Zhang. Random design analysis of ridge regression. In Shie Mannor, Nathan Srebro, and Robert C. Williamson, editors, *Proceedings of the 25th Annual Conference on Learning Theory*, volume 23 of *Proceedings of Machine Learning Research*, pages 9.1–9.24, Edinburgh, Scotland, 25–27 Jun 2012. PMLR.
- [69] Daniel Hsu, Sham M. Kakade, and Tong Zhang. Dimension-free tail inequalities for sums of random matrices, 2011.
- [70] Ilya A Strebulaev and Toni M Whited. Dynamic models and structural estimation in corporate finance. *Final pre-publication version, published in Foundations and Trends in Finance*, 6:1–163, 2012.
- [71] George Tauchen. Finite state markov-chain approximations to univariate and vector autoregressions. *Economics Letters*, 20(2):177–181, 1986.
- [72] Terence Tao. 254a, notes 3a: Eigenvalues and sums of hermitian matrices. *Terence Tao’s blog*, 2010.

## Checklist

1. For all authors...
  - (a) Do the main claims made in the abstract and introduction accurately reflect the paper’s contributions and scope? [\[Yes\]](#)
  - (b) Did you describe the limitations of your work? [\[Yes\]](#)
  - (c) Did you discuss any potential negative societal impacts of your work? [\[No\]](#)
  - (d) Have you read the ethics review guidelines and ensured that your paper conforms to them? [\[Yes\]](#)
2. If you are including theoretical results...
  - (a) Did you state the full set of assumptions of all theoretical results? [\[Yes\]](#)
  - (b) Did you include complete proofs of all theoretical results? [\[Yes\]](#)
3. If you ran experiments...
  - (a) Did you include the code, data, and instructions needed to reproduce the main experimental results (either in the supplemental material or as a URL)? [\[Yes\]](#)
  - (b) Did you specify all the training details (e.g., data splits, hyperparameters, how they were chosen)? [\[Yes\]](#)

- 530 (c) Did you report error bars (e.g., with respect to the random seed after running experi-  
531 ments multiple times)? [N/A]
- 532 (d) Did you include the total amount of compute and the type of resources used (e.g., type  
533 of GPUs, internal cluster, or cloud provider)? [Yes] See the supplementary.
- 534 4. If you are using existing assets (e.g., code, data, models) or curating/releasing new assets...
- 535 (a) If your work uses existing assets, did you cite the creators? [N/A]
- 536 (b) Did you mention the license of the assets? [N/A]
- 537 (c) Did you include any new assets either in the supplemental material or as a URL? [N/A]
- 538
- 539 (d) Did you discuss whether and how consent was obtained from people whose data you're  
540 using/curating? [N/A]
- 541 (e) Did you discuss whether the data you are using/curating contains personally identifiable  
542 information or offensive content? [N/A]
- 543 5. If you used crowdsourcing or conducted research with human subjects...
- 544 (a) Did you include the full text of instructions given to participants and screenshots, if  
545 applicable? [N/A]
- 546 (b) Did you describe any potential participant risks, with links to Institutional Review  
547 Board (IRB) approvals, if applicable? [N/A]
- 548 (c) Did you include the estimated hourly wage paid to participants and the total amount  
549 spent on participant compensation? [N/A]

## 550 A Proofs

551 We provide hereafter the proofs of the statements made in the main body.

### 552 A.1 Proof of Theorem 3

553 Let  $r \in \mathbb{R}^{|\mathcal{S}| \times |\mathcal{A}|}$  be the reward function common to the two experts, and let  $v^1, v^2 \in \mathbb{R}^{|\mathcal{S}|}$  be the  
 554 entropy regularized values functions associated experts 1 and 2 respectively and the reward function  
 555  $r$ . Then, according to Theorem 1, we have that  $\forall (s, a) \in \mathcal{S} \times \mathcal{A}$ ,

$$\begin{aligned} r(s, a) &= \lambda \log \pi^1(a|s) - \gamma_1 \sum_{s' \in \mathcal{S}} T^1(s'|s, a) v^1(s') + v^1(s) \\ &= \lambda \log \pi^2(a|s) - \gamma_2 \sum_{s' \in \mathcal{S}} T^2(s'|s, a) v^2(s') + v^2(s) \end{aligned}$$

556 where  $\pi^1, \pi^2$  denote the policies of experts 1 and 2 respectively. We hence deduce that  $\forall a \in \mathcal{A}$ ,

$$(I - \gamma_1 T_a^1 \quad -(I - \gamma_2 T_a^2)) \begin{pmatrix} v^1 \\ v^2 \end{pmatrix} = \lambda \log \pi^2(a|\cdot) - \lambda \log \pi^1(a|\cdot). \quad (13)$$

557 By including all available actions to the experts, we can write

$$\begin{pmatrix} I - \gamma_1 T_{a_1}^1 & -(I - \gamma_2 T_{a_1}^2) \\ \vdots & \vdots \\ I - \gamma_1 T_{a_{|\mathcal{A}|}}^1 & -(I - \gamma_2 T_{a_{|\mathcal{A}|}}^2) \end{pmatrix} \begin{pmatrix} v^1 \\ v^2 \end{pmatrix} = \begin{pmatrix} \lambda \log \pi^2(\cdot|a_1) - \lambda \log \pi^1(\cdot|a_1) \\ \vdots \\ \lambda \log \pi^2(\cdot|a_{|\mathcal{A}|}) - \lambda \log \pi^1(\cdot|a_{|\mathcal{A}|}) \end{pmatrix}. \quad (14)$$

558 Reward identifiability is directly related to the size of the solution space of the linear system (14).  
 559 Since we assume that both experts are optimal with respect to a *true* reward function  $r$ , we know  
 560 that the associated value function solves equation (14), and hence that this system is feasible. The  
 561 solution space then depends on the rank of the matrix in the left hand side of (14), which we denote  
 562 by  $A$ .

563 We first show that there always exists an eigenvector of  $A$  associated with eigenvalue 0. Indeed, since  
 564 the matrices  $T_a$  are transition matrices, their rows must sum to 1, which can be written as  $T_a \mathbf{1} = \mathbf{1}$   
 565 where  $\mathbf{1}$  is a  $\mathcal{S}$  dimensional column vector of 1's. Hence,

$$A \begin{pmatrix} \frac{1}{1-\gamma_1} \mathbf{1} \\ \frac{1}{1-\gamma_2} \mathbf{1} \end{pmatrix} = \begin{pmatrix} \frac{1}{1-\gamma_1} (\mathbf{1} - \gamma_1 T_{a_1}^1 \mathbf{1}) - \frac{1}{1-\gamma_2} (\mathbf{1} - \gamma_2 T_{a_1}^2 \mathbf{1}) \\ \vdots \\ \frac{1}{1-\gamma_1} (\mathbf{1} - \gamma_1 T_{a_{|\mathcal{A}|}}^1 \mathbf{1}) - \frac{1}{1-\gamma_2} (\mathbf{1} - \gamma_2 T_{a_{|\mathcal{A}|}}^2 \mathbf{1}) \end{pmatrix} = \mathbf{0}$$

566 Hence, the vector  $\begin{pmatrix} \frac{1}{1-\gamma_1} \mathbf{1} \\ \frac{1}{1-\gamma_2} \mathbf{1} \end{pmatrix}$  is an eigenvector of  $A$  with eigenvalue 0, and corresponds to the  
 567 invariance of the optimal policy under addition of a constant to the reward function.

568 Suppose now that  $\text{rank}(A) = 2|\mathcal{S}| - 1$ . Since  $A$  has  $2\mathcal{S}$  columns, this implies that the only eigenvector  
 569 with eigenvalue 0 is  $\begin{pmatrix} \frac{1}{1-\gamma_1} \mathbf{1} \\ \frac{1}{1-\gamma_2} \mathbf{1} \end{pmatrix}$ , and thus that we can recover the value function  $v^1$  (or  $v^2$  equivalently)  
 570 up to an additive constant. Using Theorem 1 again, it implies that we can also recover the reward  
 571 function up to a constant.

572 On the other hand, suppose that  $\text{rank}(A) < 2|\mathcal{S}| - 1$ . Then, there exists another vector in  $\text{Ker}(A)$   
 573 which is linearly independent of  $\begin{pmatrix} \frac{1}{1-\gamma_1} \mathbf{1} \\ \frac{1}{1-\gamma_2} \mathbf{1} \end{pmatrix}$ , and whose addition to the value function would not  
 574 change the optimal policy. However, it is easy to check that the only eigenvector of  $A$  with eigenvalue  
 575 0 of the form  $\begin{pmatrix} c_1 \mathbf{1} \\ c_2 \mathbf{1} \end{pmatrix}$  with  $c_1, c_2 \in \mathbb{R}$  is proportional to  $\begin{pmatrix} \frac{1}{1-\gamma_1} \mathbf{1} \\ \frac{1}{1-\gamma_2} \mathbf{1} \end{pmatrix}$ . Hence, any other vector in  $\text{Ker}(A)$   
 576 would induce a modification of the value and reward functions more complex than just adding a  
 577 constant. The provided condition is hence also necessary.

**Equivalence with Definition 2.** It turns out that our rank condition (5) is equivalent to the value-distinguishing assumption of Definition 2. To show this, we first notice that, if  $v^1, v^2$  satisfy equation (2), and if  $v^1$  is a constant vector, then  $v^2$  must also be a constant vector, and vice versa. Indeed, equation (2) can be written as

$$(I - \gamma_1 T_a^1) v^1 = (I - \gamma_2 T_a^2) v^2 \quad \forall a \in \mathcal{A}.$$

Since,  $\forall a \in \mathcal{A}, i = 1, 2$ ,  $\mathbf{1}$  is an eigenvector of  $T_a^i$  with eigenvalue 1, then  $\mathbf{1}$  is also an eigenvector of  $(I - \gamma_2 T_a^2)^{-1}$  with eigenvalue  $\frac{1}{1-\gamma_2}$ . Hence, if  $v^1 = c\mathbf{1}$  is a constant vector, then  $v^2 = (I - \gamma_2 T_a^2)^{-1} (I - \gamma_1 T_a^1) v^1 = c \frac{1-\gamma_1}{1-\gamma_2} \mathbf{1}$  is also a constant vector, and the associated constant is determined by the constant of  $v^1$ . Thus, the condition of Definition 2 can be rewritten as

$$(I - \gamma_1 T_a^1) v^1 = (I - \gamma_2 T_a^2) v^2 \quad \forall a \in \mathcal{A} \Rightarrow (v^1, v^2) = (c\mathbf{1}, c \frac{1-\gamma_1}{1-\gamma_2} \mathbf{1}) \text{ for some } c \in \mathbb{R}.$$

This is hence equivalent to

$$\dim \left( \text{Ker} \begin{pmatrix} I - \gamma_1 T_{a_1}^1 & I - \gamma_2 T_{a_1}^2 \\ \vdots & \vdots \\ I - \gamma_1 T_{a_{|\mathcal{A}|}}^1 & I - \gamma_2 T_{a_{|\mathcal{A}|}}^2 \end{pmatrix} \right) = 1.$$

which is equivalent to equation (5).

## A.2 Proof of Corollary 4

Let  $v^1, v^2, v^3 \in \mathbb{R}^{|\mathcal{S}|}$  be the entropy regularized value functions associated with experts 1, 2 and 3 respectively. Following the proof of Theorem 3, these vectors must satisfy

$$\begin{pmatrix} I - \gamma_1 T_{a_1}^1 & -(I - \gamma_2 T_{a_1}^2) & \mathbf{0} \\ \vdots & \vdots & \vdots \\ I - \gamma_1 T_{a_{|\mathcal{A}|}}^1 & -(I - \gamma_2 T_{a_{|\mathcal{A}|}}^2) & \mathbf{0} \\ I - \gamma_1 T_{a_1}^1 & \mathbf{0} & -(I - \gamma_3 T_{a_1}^3) \\ \vdots & \vdots & \vdots \\ I - \gamma_1 T_{a_{|\mathcal{A}|}}^1 & \mathbf{0} & -(I - \gamma_3 T_{a_{|\mathcal{A}|}}^3) \end{pmatrix} \begin{pmatrix} v^1 \\ v^2 \\ v^3 \end{pmatrix} = \begin{pmatrix} \lambda \log \pi^2(\cdot|a_1) - \lambda \log \pi^1(\cdot|a_1) \\ \vdots \\ \lambda \log \pi^2(\cdot|a_{|\mathcal{A}|}) - \lambda \log \pi^1(\cdot|a_{|\mathcal{A}|}) \\ \lambda \log \pi^3(\cdot|a_1) - \lambda \log \pi^1(\cdot|a_1) \\ \vdots \\ \lambda \log \pi^3(\cdot|a_{|\mathcal{A}|}) - \lambda \log \pi^1(\cdot|a_{|\mathcal{A}|}) \end{pmatrix}. \quad (15)$$

Similarly as previously, we can easily show that the vector  $\begin{pmatrix} \frac{1}{1-\gamma_1} \mathbf{1} \\ \frac{1}{1-\gamma_2} \mathbf{1} \\ \frac{1}{1-\gamma_3} \mathbf{1} \end{pmatrix} \in \text{Ker}(A')$ , where  $A'$  denotes the matrix on the left of equation (15). In order for the reward to be recovered up to a constant, we hence need that there is no other linearly independent vector in  $\text{Ker}(A')$ , i.e., that  $\text{rank}(A') = 3|\mathcal{S}| - 1$ .

## A.3 Proof of Corollary 5

We want to show that

$$\dim \left( \text{Ker} \begin{pmatrix} I - \gamma_1 T_{a_1} & -(I - \gamma_2 T_{a_1}) \\ \vdots & \vdots \\ I - \gamma_1 T_{a_{|\mathcal{A}|}} & -(I - \gamma_2 T_{a_{|\mathcal{A}|}}) \end{pmatrix} \right) = 1. \quad (16)$$

Suppose that  $\begin{pmatrix} v^1 \\ v^2 \end{pmatrix} \in \text{Ker} \begin{pmatrix} I - \gamma_1 T_{a_1} & -(I - \gamma_2 T_{a_1}) \\ \vdots & \vdots \\ I - \gamma_1 T_{a_{|\mathcal{A}|}} & -(I - \gamma_2 T_{a_{|\mathcal{A}|}}) \end{pmatrix}$ , i.e.,

$$(I - \gamma_1 T_a) v^1 = (I - \gamma_2 T_a) v^2 \quad \forall a \in \mathcal{A}, \quad (17)$$



or equivalently

$$v^1 - v^2 = T_a(\gamma_1 v^1 - \gamma_2 v^2) \forall a \in \mathcal{A}. \quad (18)$$

Subtracting equation (18) for  $a = a_1$  and  $a = a_i$ , we get

$$(T_{a_1} - T_{a_i})(\gamma_1 v^1 - \gamma_2 v^2) = 0 \forall i. \quad (19)$$

Using equation (7) and the fact that the vector  $\mathbf{1} \in \mathbb{R}^{|\mathcal{S}|}$  always belongs to  $\text{Ker} \begin{pmatrix} T_{a_1} - T_{a_2} \\ \vdots \\ T_{a_1} - T_{a_{|\mathcal{A}|}} \end{pmatrix}$ , we

have that  $\text{Ker} \begin{pmatrix} T_{a_1} - T_{a_2} \\ \vdots \\ T_{a_1} - T_{a_{|\mathcal{A}|}} \end{pmatrix} = \text{Span}(\mathbf{1})$ . Thus, we deduce from equation (19) that

$$\gamma_1 v^1 - \gamma_2 v^2 = c\mathbf{1} \quad (20)$$

for some  $c \in \mathbb{R}$ . Using the fact that for any  $a \in \mathcal{A}$ ,  $\mathbf{1}$  is an eigenvector of  $T_a$  with eigenvalue 1, we deduce from (18) and (20) that

$$v^1 - v^2 = T_a c\mathbf{1} = c\mathbf{1}. \quad (21)$$

Solving equations (20) and (21) for  $v^1$  and  $v^2$ , we find  $v^1 = \frac{c(1-\gamma_2)}{\gamma_1-\gamma_2}\mathbf{1}$  and  $v^2 = \frac{c(1-\gamma_1)}{\gamma_2-\gamma_1}\mathbf{1}$ . Therefore,

$$\text{Ker} \begin{pmatrix} I - \gamma_1 T_{a_1}^1 & -(I - \gamma_2 T_{a_1}^2) \\ \vdots & \vdots \\ I - \gamma_1 T_{a_{|\mathcal{A}|}}^1 & -(I - \gamma_2 T_{a_{|\mathcal{A}|}}^2) \end{pmatrix} = \left\{ \begin{pmatrix} v^1 \\ v^2 \end{pmatrix} : v^1 = \frac{c(1-\gamma_2)}{\gamma_1-\gamma_2}\mathbf{1}, v^2 = \frac{c(1-\gamma_1)}{\gamma_2-\gamma_1}\mathbf{1} \text{ for } c \in \mathbb{R} \right\}$$

which shows that condition (16) holds. On the other hand, if condition (7) does not hold, then

$\text{Ker} \begin{pmatrix} T_{a_1} - T_{a_2} \\ \vdots \\ T_{a_1} - T_{a_{|\mathcal{A}|}} \end{pmatrix}$  contains another vector  $v_0$  which is not a constant vector, so the reward cannot be recovered up to a constant.

#### A.4 Proof of Theorem 7

Suppose that  $\mathbf{1} \in \text{Im} \begin{pmatrix} f_{a_1} \\ \vdots \\ f_{a_{|\mathcal{A}|}} \end{pmatrix}$ , i.e.,  $\exists \theta \in \mathbb{R}^d$  such that  $\begin{pmatrix} f_{a_1} \\ \vdots \\ f_{a_{|\mathcal{A}|}} \end{pmatrix} \theta = \mathbf{1}$ . This implies that

$$\begin{pmatrix} I - \gamma_1 T_{a_1}^1 & I - \gamma_2 T_{a_1}^2 & \mathbf{0} \\ \vdots & \vdots & \vdots \\ I - \gamma_1 T_{a_{|\mathcal{A}|}}^1 & I - \gamma_2 T_{a_{|\mathcal{A}|}}^2 & \mathbf{0} \\ I - \gamma_1 T_{a_1}^1 & \mathbf{0} & f_{a_1} \\ \vdots & \vdots & \vdots \\ I - \gamma_1 T_{a_{|\mathcal{A}|}}^1 & \mathbf{0} & f_{a_{|\mathcal{A}|}} \end{pmatrix} \begin{pmatrix} \frac{1}{1-\gamma_1}\mathbf{1} \\ -\frac{1}{1-\gamma_2}\mathbf{1} \\ -\theta \end{pmatrix} = \mathbf{0}. \quad (22)$$

Suppose that condition (8) holds, i.e., that

$$\dim \left( \text{Ker} \begin{pmatrix} I - \gamma_1 T_{a_1}^1 & I - \gamma_2 T_{a_1}^2 & \mathbf{0} \\ \vdots & \vdots & \vdots \\ I - \gamma_1 T_{a_{|\mathcal{A}|}}^1 & I - \gamma_2 T_{a_{|\mathcal{A}|}}^2 & \mathbf{0} \\ I - \gamma_1 T_{a_1}^1 & \mathbf{0} & f_{a_1} \\ \vdots & \vdots & \vdots \\ I - \gamma_1 T_{a_{|\mathcal{A}|}}^1 & \mathbf{0} & f_{a_{|\mathcal{A}|}} \end{pmatrix} \right) = 1. \quad (23)$$

Equations (22) and (23) thus imply that

$$\text{Ker} \begin{pmatrix} I - \gamma_1 T_{a_1}^1 & I - \gamma_2 T_{a_1}^2 & \mathbf{0} \\ \vdots & \vdots & \vdots \\ I - \gamma_1 T_{a_{|\mathcal{A}|}}^1 & I - \gamma_2 T_{a_{|\mathcal{A}|}}^2 & \mathbf{0} \\ I - \gamma_1 T_{a_1}^1 & \mathbf{0} & f_{a_1} \\ \vdots & \vdots & \vdots \\ I - \gamma_1 T_{a_{|\mathcal{A}|}}^1 & \mathbf{0} & f_{a_{|\mathcal{A}|}} \end{pmatrix} = \text{Span} \left( \begin{pmatrix} \frac{1}{1-\gamma_1} \mathbf{1} \\ -\frac{1}{1-\gamma_2} \mathbf{1} \\ -\theta \end{pmatrix} \right). \quad (24)$$

This means that for any  $v^1, v^2$  satisfying  $(I - \gamma_1 T_a^1)v^1 = (I - \gamma_1 T_a^2)v^2 \forall a \in \mathcal{A}$  and such that  $\exists \theta \in \mathbb{R}^d$ ,  $(I - \gamma_1 T_a^1)v^1 = f_a \theta \forall a \in \mathcal{A}$ , then  $v^1 \propto \mathbf{1}$ .

Now suppose that we recover a reward function  $r(s, a) = \theta^T f_{s,a}$  compatible with the two experts, i.e.,

$$r(\cdot, a) = r^*(\cdot, a) + (I - \gamma_1 T_a^1)v^1 \quad (25)$$

where  $r^*(s, a) = \theta^{*T} f_{s,a}$  denotes the true reward and  $v^1$  satisfies  $(I - \gamma_1 T_a^1)v^1 = (I - \gamma_2 T_a^2)v^2 \forall a \in \mathcal{A}$ . Then,  $(I - \gamma_1 T_a^1)v^1 = r(\cdot, a) - r^*(\cdot, a) = f_a(\theta - \theta^*)$ , and hence  $\exists \tilde{\theta} \in \mathbb{R}^d$  such that  $(I - \gamma_1 T_a^1)v^1 = f_a \tilde{\theta} \forall a \in \mathcal{A}$ . Thus,  $v^1 \propto \mathbf{1}$  and the reward is recovered up to a constant.

Suppose now that  $\mathbf{1} \notin \text{Im} \begin{pmatrix} f_{a_1} \\ \vdots \\ f_{a_{|\mathcal{A}|}} \end{pmatrix}$ . Then, the condition

$$\text{rank} \begin{pmatrix} I - \gamma_1 T_{a_1}^1 & I - \gamma_2 T_{a_1}^2 & \mathbf{0} \\ \vdots & \vdots & \vdots \\ I - \gamma_1 T_{a_{|\mathcal{A}|}}^1 & I - \gamma_2 T_{a_{|\mathcal{A}|}}^2 & \mathbf{0} \\ I - \gamma_1 T_{a_1}^1 & \mathbf{0} & f_{a_1} \\ \vdots & \vdots & \vdots \\ I - \gamma_1 T_{a_{|\mathcal{A}|}}^1 & \mathbf{0} & f_{a_{|\mathcal{A}|}} \end{pmatrix} = 2|\mathcal{S}| + d. \quad (26)$$

means that this matrix is full rank and hence that its kernel is  $\{\mathbf{0}\}$ . Thus, if we recover a reward of the form (25), following the same argument as previously, this means that  $v^1 = 0$ , and thus that the reward function is recovered exactly.

## A.5 Proof of Corollary 6

Without loss of generality, let us assume that the exogenous variable can only take two possible values, i.e., the state space is defined as  $\mathcal{S} = \{(s, e) : s \in \mathcal{S}_0, e \in \{e_1, e_2\}\}$ , where  $e$  denotes the exogenous variable and  $\mathcal{S}_0$  contains all other variables. Exogeneity of variable  $e$  implies that  $\forall e \in \{e_1, e_2\}$ ,  $p(e^{t+1} = e_1 | s^t = s, e^t = e, a^t = a) = p(e^{t+1} = e_1 | e^t = e)$  does not depend on  $s$  nor  $a$ .

Suppose that we order the states as  $\{(e_1, s)\}_{s \in \mathcal{S}_0}, \{(e_2, s)\}_{s \in \mathcal{S}_0}$ . Then, the transition matrix for each expert  $i$  associated with action  $a$  has the following form:

$$T_a^i = \begin{pmatrix} p_1^i T_{a,1}^i & (1 - p_1^i) T_{a,1}^i \\ (1 - p_2^i) T_{a,2}^i & p_2^i T_{a,2}^i \end{pmatrix} \quad (27)$$

where for each expert  $i$  and exogenous variable  $e_j, j = 1, 2$ ,  $p_j^i = p^i(e^{t+1} = e_j | e^t = e_j)$  and  $T_{a,j}^i \in \mathbb{R}^{|\mathcal{S}_0| \times |\mathcal{S}_0|}$  denotes the transition matrix of expert  $i$  for state variables in  $\mathcal{S}_0$  knowing that the current value of state variable  $e$  is  $e_j$ , i.e.  $T_{a,j}^i(s, s') = p^i(s^{t+1} = s' | s^t = s, e^t = e_j, a^t = a) \forall s, s' \in \mathcal{S}_0$  where  $p^i$  denotes the state transition probability in environment  $i$ .

633 We first show the result in the case of two experts. The matrix  $A = \begin{pmatrix} I - \gamma_1 T_{a_1}^1 & I - \gamma_2 T_{a_1}^2 \\ \vdots & \vdots \\ I - \gamma_1 T_{a_{|\mathcal{A}|}}^1 & I - \gamma_2 T_{a_{|\mathcal{A}|}}^2 \end{pmatrix}$   
 634 has the following form:

$$A = \begin{pmatrix} I - \gamma_1 p_1^1 T_{a_1,1}^1 & -\gamma_1(1 - p_1^1) T_{a_1,1}^1 & I - \gamma_2 p_1^2 T_{a_1,1}^2 & -\gamma_2(1 - p_1^2) T_{a_1,1}^2 \\ -\gamma_1(1 - p_2^1) T_{a_1,2}^1 & I - \gamma_1 p_2^1 T_{a_1,2}^1 & -\gamma_2(1 - p_2^2) T_{a_1,2}^2 & I - \gamma_2 p_2^2 T_{a_1,2}^2 \\ \vdots & \vdots & \vdots & \vdots \\ I - \gamma_1 p_1^1 T_{a_{|\mathcal{A}|},1}^1 & -\gamma_1(1 - p_1^1) T_{a_{|\mathcal{A}|},1}^1 & I - \gamma_2 p_1^2 T_{a_{|\mathcal{A}|},1}^2 & -\gamma_2(1 - p_1^2) T_{a_{|\mathcal{A}|},1}^2 \\ -\gamma_1(1 - p_2^1) T_{a_{|\mathcal{A}|},2}^1 & I - \gamma_1 p_2^1 T_{a_{|\mathcal{A}|},2}^1 & -\gamma_2(1 - p_2^2) T_{a_{|\mathcal{A}|},2}^2 & I - \gamma_2 p_2^2 T_{a_{|\mathcal{A}|},2}^2 \end{pmatrix}$$

635 We know that  $v_0 = \begin{pmatrix} \frac{1}{1-\gamma_1} \mathbf{1} \\ \frac{1}{1-\gamma_1} \mathbf{1} \\ -\frac{1}{1-\gamma_2} \mathbf{1} \\ -\frac{1}{1-\gamma_2} \mathbf{1} \end{pmatrix}$  is an eigenvector of  $A$  with eigenvalue 0, corresponding to an  
 636 addition of a constant to the reward. In order to show that the reward is not identifiable, we need to  
 637 find another vector in  $\text{Ker}(A)$  linearly independent of  $v_0$ . We search for such a vector of the form

638  $v_1 = \begin{pmatrix} \mathbf{0} \\ \mathbf{1} \\ c_1 \mathbf{1} \\ c_2 \mathbf{1} \end{pmatrix}$ . Using the fact that  $\mathbf{1}$  is an eigenvector of any transition matrix with eigenvalue 1, the  
 639 condition  $v_1 \in \text{Ker}(A)$  is equivalent to

$$\begin{cases} -\gamma_1(1 - p_1^1) + c_1(1 - \gamma_2 p_1^2) - c_2 \gamma_2(1 - p_1^2) = 0 \\ 1 - \gamma_1 p_2^1 - c_1 \gamma_2(1 - p_2^2) + c_2(1 - \gamma_2 p_2^2) = 0. \end{cases}$$

640 This system of equations turns out to have a unique solution for  $(c_1, c_2)$  since

$$\begin{aligned} \det \begin{pmatrix} 1 - \gamma_2 p_1^2 & -\gamma_2(1 - p_1^2) \\ -\gamma_2(1 - p_2^2) & 1 - \gamma_2 p_2^2 \end{pmatrix} &= (1 - \gamma_2 p_1^2)(1 - \gamma_2 p_2^2) - (\gamma_2 - \gamma_2 p_1^2)(\gamma_2 - \gamma_2 p_2^2) \\ &= (1 - \gamma_2)(1 + \gamma_2 - \gamma_2 p_1^2 - \gamma_2 p_2^2) > 0 \end{aligned}$$

641 since  $0 \leq \gamma_2 < 1$ . Hence,  $\text{Ker}(A)$  contains at least two linearly independent vector, and thus  
 642  $\text{rank}(A) < 2|\mathcal{S}| - 1$ . So, according to Theorem 3, the reward function is not identifiable up to a  
 643 constant.

644 This means that, in addition to a global constant that we can add to the reward, we can also add a  
 645 constant only to the rewards associated with a specific value of the exogenous variable. The proof  
 646 naturally extends to the case of multiple experts, and when the exogenous variable can take more  
 647 than two values. Actually, in the latter case, we can find even more linearly independent vectors in  
 648  $\text{Ker}(A)$ , corresponding to adding a constant to the rewards associated with each possible value of the  
 649 exogenous variable.

## 650 A.6 Proof of Theorem 8

651 Define  $A = \begin{pmatrix} I - \gamma_1 T_{a_1}^1 & I - \gamma_2 T_{a_1}^2 \\ \vdots & \vdots \\ I - \gamma_1 T_{a_{|\mathcal{A}|}}^1 & I - \gamma_2 T_{a_{|\mathcal{A}|}}^2 \end{pmatrix}$  and  $\hat{A} = \begin{pmatrix} I - \gamma_1 \hat{T}_{a_1}^1 & I - \gamma_2 \hat{T}_{a_1}^2 \\ \vdots & \vdots \\ I - \gamma_1 \hat{T}_{a_{|\mathcal{A}|}}^1 & I - \gamma_2 \hat{T}_{a_{|\mathcal{A}|}}^2 \end{pmatrix}$ . For an arbitrary matrix  $M$ , let  $\sigma_2(M)$  denote the second smallest singular value of  $M$ . Note that the condition (5)  
 653 for  $A$  is equivalent to  $\sigma_2(A) > 0$ . From Weyl's inequality for singular values[72], we have that

$$|\sigma_2(A) - \sigma_2(\hat{A})| \leq \|A - \hat{A}\|_2.$$

654 Moreover,

$$\begin{aligned}
\|A - \hat{A}\|_2 &= \left\| \begin{pmatrix} \gamma_1(T_{a_1}^1 - \hat{T}_{a_1}^1) & \gamma_2(T_{a_1}^2 - \hat{T}_{a_1}^2) \\ \vdots & \vdots \\ \gamma_1(T_{a_{|\mathcal{A}|}}^1 - \hat{T}_{a_{|\mathcal{A}|}}^1) & \gamma_2(T_{a_{|\mathcal{A}|}}^2 - \hat{T}_{a_{|\mathcal{A}|}}^2) \end{pmatrix} \right\|_2 \\
&\leq \sqrt{2} \max(\gamma_1, \gamma_2) \max \left( \left\| \begin{pmatrix} T_{a_1}^1 - \hat{T}_{a_1}^1 \\ \vdots \\ T_{a_{|\mathcal{A}|}}^1 - \hat{T}_{a_{|\mathcal{A}|}}^1 \end{pmatrix} \right\|_2, \left\| \begin{pmatrix} T_{a_1}^2 - \hat{T}_{a_1}^2 \\ \vdots \\ T_{a_{|\mathcal{A}|}}^2 - \hat{T}_{a_{|\mathcal{A}|}}^2 \end{pmatrix} \right\|_2 \right) \\
&\leq \sqrt{2|\mathcal{A}|} \max(\gamma_1, \gamma_2) \epsilon.
\end{aligned}$$

Therefore,  $\sigma_2(A) \geq \sigma_2(\hat{A}) - \sqrt{2|\mathcal{A}|} \max(\gamma_1, \gamma_2) \epsilon$ , and hence  $\sigma_2(A) > 0$  provided that  $\sigma_2(\hat{A}) > \sqrt{2|\mathcal{A}|} \max(\gamma_1, \gamma_2) \epsilon$ .

## A.7 Proof of Theorem 9

*Proof.*  $\hat{T}_a$  can be constructed as follows. Sample  $\frac{N}{|\mathcal{S}|}$  states  $\{s'_i\}_{i=1}^{\frac{N}{|\mathcal{S}|}}$  from the distribution  $T(\cdot|s, a)$  for every state  $s \in \mathcal{S}$ . Let  $N(s)$  denote the number of times state  $s$  has been sampled, i.e.  $N(s) = \frac{N}{|\mathcal{S}|}$ . Form the matrix  $\tilde{T}_i = [\frac{1(s_i=s, s'_i=s')N}{N(s)}]_{s, s'}$ . It holds that  $\forall i, \mathbb{E}[\tilde{T}_i] = T_a$ ,  $\lambda_{\max}(\tilde{T}_i - T_a) \leq |\mathcal{S}| + 1$ ,  $\lambda_{\max}(\mathbb{E}[(\tilde{T}_i - T_a)^2]) \leq |\mathcal{S}|^2$  and  $\text{Trace}(\mathbb{E}[(\tilde{T}_i - T_a)^2]) \leq |\mathcal{S}|^2$ . Then, the result follows applying Lemma 10 in [68] and assuming  $\delta < 1/e$ . Finally, we conclude with a covering argument over the set  $\mathcal{A}$ .  $\square$

## A.8 Proof of Theorem 11

**Lemma 13.** *The condition of equation 12 holds if and only if  $\forall v^1, v^2 \in \mathbb{R}^{|\mathcal{S}|}$  satisfying  $(I - \gamma_1 T_a^1)v^1 = (I - \gamma_2 T_a^2)v^2, \forall a \in \mathcal{A}$ , there exists  $v^3 \in \mathbb{R}^{|\mathcal{S}|}$  such that  $(I - \gamma_3 T_a^3)v^3 = (I - \gamma_1 T_a^1)v^1, \forall a \in \mathcal{A}$ .*

*Proof.* Denote by  $A_1, A_2$  the matrices shown and the left and right hand side of equation (12) respectively, so that the equation reads  $\text{rank}(A_1) = \text{rank}(A_2) - |\mathcal{S}|$ , or equivalently  $2|\mathcal{S}| - \text{rank}(A_1) = 3|\mathcal{S}| - \text{rank}(A_2)$ . Using the rank theorem, it follows that  $\dim(\text{Ker}(A_1)) = \dim(\text{Ker}(A_2))$ , i.e.,

$$\begin{aligned}
&\dim(\{(v^1, v^2) \in \mathbb{R}^{2|\mathcal{S}|} : (I - \gamma_1 T_a^1)v^1 = (I - \gamma_2 T_a^2)v^2 \forall a \in \mathcal{A}\}) \\
&= \dim(\{(v^1, v^2, v^3) \in \mathbb{R}^{3|\mathcal{S}|} : (I - \gamma_1 T_a^1)v^1 = (I - \gamma_2 T_a^2)v^2 = (I - \gamma_3 T_a^3)v^3 \forall a \in \mathcal{A}\}).
\end{aligned} \tag{28}$$

Since all matrices  $I - \gamma_3 T_a^3$  are invertible for any  $a \in \mathcal{A}$ , it follows that for any  $(v^1, v^2) \in \mathbb{R}^{2|\mathcal{S}|}$ , there can exist at most one vector  $v^3 \in \mathbb{R}^{|\mathcal{S}|}$  such that  $(I - \gamma_1 T_a^1)v^1 = (I - \gamma_2 T_a^2)v^2 = (I - \gamma_3 T_a^3)v^3 \forall a \in \mathcal{A}$ . We hence deduce that

$$\begin{aligned}
&\dim(\{(v^1, v^2, v^3) \in \mathbb{R}^{3|\mathcal{S}|} : (I - \gamma_1 T_a^1)v^1 = (I - \gamma_2 T_a^2)v^2 = (I - \gamma_3 T_a^3)v^3 \forall a \in \mathcal{A}\}) \\
&= \dim(\{(v^1, v^2) \in \mathbb{R}^{2|\mathcal{S}|} : \exists v^3 \in \mathbb{R}^{|\mathcal{S}|}, (I - \gamma_1 T_a^1)v^1 = (I - \gamma_2 T_a^2)v^2 = (I - \gamma_3 T_a^3)v^3 \forall a \in \mathcal{A}\}).
\end{aligned} \tag{29}$$

Plugging equation (29) in (28), we have

$$\begin{aligned}
&\dim(\{(v^1, v^2) \in \mathbb{R}^{2|\mathcal{S}|} : (I - \gamma_1 T_a^1)v^1 = (I - \gamma_2 T_a^2)v^2 \forall a \in \mathcal{A}\}) \\
&= \dim(\{(v^1, v^2) \in \mathbb{R}^{2|\mathcal{S}|} : \exists v^3 \in \mathbb{R}^{|\mathcal{S}|}, (I - \gamma_1 T_a^1)v^1 = (I - \gamma_2 T_a^2)v^2 = (I - \gamma_3 T_a^3)v^3 \forall a \in \mathcal{A}\}).
\end{aligned} \tag{30}$$

Moreover, we can clearly see that

$$\begin{aligned} \{(v^1, v^2) \in \mathbb{R}^{2|S|} : \exists v^3 \in \mathbb{R}^{|S|}, (I - \gamma_1 T_a^1)v^1 = (I - \gamma_2 T_a^2)v^2 = (I - \gamma_3 T_a^3)v^3 \forall a \in \mathcal{A}\} \\ \subseteq \{(v^1, v^2) \in \mathbb{R}^{2|S|} : (I - \gamma_1 T_a^1)v^1 = (I - \gamma_2 T_a^2)v^2 \forall a \in \mathcal{A}\}. \end{aligned}$$

Thus, together with equation (30), we can conclude that

$$\begin{aligned} \{(v^1, v^2) \in \mathbb{R}^{2|S|} : \exists v^3 \in \mathbb{R}^{|S|}, (I - \gamma_1 T_a^1)v^1 = (I - \gamma_2 T_a^2)v^2 = (I - \gamma_3 T_a^3)v^3 \forall a \in \mathcal{A}\} \\ = \{(v^1, v^2) \in \mathbb{R}^{2|S|} : (I - \gamma_1 T_a^1)v^1 = (I - \gamma_2 T_a^2)v^2 \forall a \in \mathcal{A}\} \end{aligned}$$

which shows the result.

Suppose now that condition 12 does not hold, i.e.,

$$\begin{aligned} \dim(\{(v^1, v^2) \in \mathbb{R}^{2|S|} : (I - \gamma_1 T_a^1)v^1 = (I - \gamma_2 T_a^2)v^2 \forall a \in \mathcal{A}\}) \\ > \dim(\{(v^1, v^2) \in \mathbb{R}^{3|S|} : \exists v^3 \in \mathbb{R}^{|S|}, (I - \gamma_1 T_a^1)v^1 = (I - \gamma_2 T_a^2)v^2 = (I - \gamma_3 T_a^3)v^3 \forall a \in \mathcal{A}\}). \end{aligned} \quad (31)$$

This directly implies that there must exist a pair  $(v^1, v^2)$ , such that there exists no  $v^3 \in \mathbb{R}^{|S|}$  satisfying  $(I - \gamma_3 T_a^3)v^3 = (I - \gamma_1 T_a^1)v^1 \forall a \in \mathcal{A}$  hence finalizing the proof.

□

We now turn to the proof of Theorem 11. Let  $r^*$  be the ground truth reward, and suppose that we recover some reward function  $r$  from policies  $\pi^1, \pi^2$ , i.e.,  $\pi^1, \pi^2$  are optimal with respect to both rewards  $r$  and  $r^*$  on  $(T^1, \gamma_1), (T^2, \gamma_2)$  respectively. Suppose that we train a policy  $\pi^3$  optimally with respect to  $r$  on  $(T^3, \gamma_3)$ . We want to show that  $\pi^3$  is also optimal with respect to the true reward  $r^*$ .

Let  $v^i, v_*^i$  be the value vectors associated to expert  $i = 1, 2$  with respect to rewards  $r$  and  $r^*$  respectively, i.e., such that

$$r(\cdot, a) = \lambda \log \pi^1(a|\cdot) + (I - \gamma_1 T_a^1)v^1 = \lambda \log \pi^2(a|\cdot) + (I - \gamma_2 T_a^2)v^2 \quad (32)$$

$$r^*(\cdot, a) = \lambda \log \pi^1(a|\cdot) + (I - \gamma_1 T_a^1)v_*^1 = \lambda \log \pi^2(a|\cdot) + (I - \gamma_2 T_a^2)v_*^2. \quad (33)$$

Let  $v^3$  be the value vector associated with expert 3 with respect to reward  $r$ , i.e., such that  $\forall a \in \mathcal{A}$

$$r(\cdot, a) = \lambda \log \pi^3(a|\cdot) + (I - \gamma_3 T_a^3)v^3. \quad (34)$$

We need to show that there exists a vector  $v_*^3 \in \mathbb{R}^{|S|}$  such that  $\forall a \in \mathcal{A}$

$$r^*(\cdot, a) = \lambda \log \pi^3(a|\cdot) + (I - \gamma_3 T_a^3)v_*^3. \quad (35)$$

Using equations (32), (33) and (34), we have  $\forall a \in \mathcal{A}$

$$r^*(\cdot, a) = \lambda \log \pi^1(a|\cdot) + (I - \gamma_1 T_a^1)v_*^1 \quad (36)$$

$$= r(\cdot, a) - (I - \gamma_1 T_a^1)v^1 + (I - \gamma_1 T_a^1)v_*^1 \quad (37)$$

$$= \lambda \log \pi^3(a|\cdot) + (I - \gamma_3 T_a^3)v^3 + (I - \gamma_1 T_a^1)(v^1 - v_*^1). \quad (38)$$

Moreover, subtracting equations (32) and (33), we have

$$(I - \gamma_1 T_a^1)(v^1 - v_*^1) = (I - \gamma_2 T_a^2)(v^2 - v_*^2)$$

Therefore, using our assumption and Lemma 13, there exists a vector  $\tilde{v}_3 \in \mathbb{R}^{|S|}$  such that  $(I - \gamma_1 T_a^1)(v^1 - v_*^1) = (I - \gamma_3 T_a^3)\tilde{v}_3$ . Hence, combined with equation (38), we conclude that there exists  $v_*^3 \in \mathbb{R}^{|S|}$  such that  $\forall a \in \mathcal{A}$

$$r^*(\cdot, a) = \lambda \log \pi^3(a|\cdot) + (I - \gamma_3 T_a^3)v_*^3. \quad (39)$$

Using Theorem 1, we conclude that  $r^*$  belongs to the set rewards compatible with  $\pi^3$ , and hence that  $\pi^3$ , which has been optimized for  $r$ , is also optimal for the ground truth reward  $r^*$ .

On the other hand, if condition 12 does not hold, according to Lemma 13, we can construct a reward function  $r$  compatible with experts 1 and 2 that cannot be written in the form  $r(\cdot, a) = \lambda \log \pi^3(a|\cdot) + (I - \gamma_3 T_a^3)v^3$  for some  $v^3 \in \mathbb{R}^{|S|}$ . Hence, thanks to Theorem 1, the policy  $\pi^3$  cannot be optimal for such a reward function. Hence, there will necessarily exist some recovered reward functions that would lead to a sub-optimal policy in environment 3.

## 702 A.9 Proof of Corollary 12

703 For the setup describe in this corollary, we need to verify condition (12). By the rank theorem, this  
 704 condition is equivalent to

$$\dim \left( \text{Ker} \begin{pmatrix} I - \gamma_1 T_{a_1} & I - \gamma_2 T_{a_1} \\ \vdots & \vdots \\ I - \gamma_1 T_{a_{|\mathcal{A}|}} & I - \gamma_2 T_{a_{|\mathcal{A}|}} \end{pmatrix} \right) = \dim \left( \text{Ker} \begin{pmatrix} I - \gamma_1 T_{a_1} & I - \gamma_2 T_{a_1} & \mathbf{0} \\ \vdots & \vdots & \vdots \\ I - \gamma_1 T_{a_{|\mathcal{A}|}} & I - \gamma_2 T_{a_{|\mathcal{A}|}} & \mathbf{0} \\ I - \gamma_1 T_{a_1} & \mathbf{0} & I - \gamma_3 T_{a_1} \\ \vdots & \vdots & \vdots \\ I - \gamma_1 T_{a_{|\mathcal{A}|}} & \mathbf{0} & I - \gamma_3 T_{a_{|\mathcal{A}|}} \end{pmatrix} \right). \quad (40)$$

705 To this end, we will show that any element  $(v^1, v^2) \in \mathbb{R}^{2|\mathcal{S}|}$  of the kernel space of the left hand side  
 706 is associated a single element  $(v^1, v^2, v^3) \in \mathbb{R}^{3|\mathcal{S}|}$  of the kernel space of the right hand side. More  
 707 precisely, we need to show that for any  $v^1, v^2$  satisfying

$$(I - \gamma_1 T_a)v^1 = (I - \gamma_2 T_a)v^2 \quad \forall a \in \mathcal{A},$$

708 there exists a unique  $v^3 \in \mathbb{R}^{|\mathcal{S}|}$  such that

$$(I - \gamma_1 T_a)v^1 = (I - \gamma_3 T_a)v^3 \quad \forall a \in \mathcal{A}.$$

709 Consider the action  $a_0$  satisfying by assumption that  $T_{a_0}$  commutes with all other matrices  $T_a$ ,  
 710  $a \in \mathcal{A}$ . Define  $v^3 = (I - \gamma_3 T_{a_0})^{-1}(I - \gamma_1 T_{a_0})v^1$ . Notice that for any  $a \in \mathcal{A}$ , we can write  
 711  $I - \gamma_3 T_a = \alpha(I - \gamma_1 T_a) + (1 - \alpha)(I - \gamma_2 T_a)$  where  $\alpha = \frac{\gamma_3 - \gamma_2}{\gamma_1 - \gamma_2}$ . Moreover, recall that, if any two  
 712 invertible matrices  $A$  and  $B$  commute, then  $A$  and  $B^{-1}$  also commute.

713 Using these properties, we then have for any  $a \in \mathcal{A}$ ,

$$\begin{aligned} (I - \gamma_3 T_a)v^3 &= \alpha(I - \gamma_1 T_a)v^3 + (1 - \alpha)(I - \gamma_2 T_a)v^3 \\ &= \alpha(I - \gamma_1 T_a)(I - \gamma_3 T_{a_0})^{-1}(I - \gamma_1 T_{a_0})v^1 + (1 - \alpha)(I - \gamma_2 T_a)(I - \gamma_3 T_{a_0})^{-1}(I - \gamma_1 T_{a_0})v^1 \\ &= \alpha(I - \gamma_1 T_a)(I - \gamma_3 T_{a_0})^{-1}(I - \gamma_1 T_{a_0})v^1 + (1 - \alpha)(I - \gamma_2 T_a)(I - \gamma_3 T_{a_0})^{-1}(I - \gamma_2 T_{a_0})v^2 \\ &= \alpha(I - \gamma_1 T_a)(I - \gamma_3 T_{a_0})^{-1}(I - \gamma_1 T_{a_0})v^1 + (1 - \alpha)(I - \gamma_3 T_{a_0})^{-1}(I - \gamma_2 T_{a_0})(I - \gamma_2 T_a)v^2 \\ &= \alpha(I - \gamma_1 T_a)(I - \gamma_3 T_{a_0})^{-1}(I - \gamma_1 T_{a_0})v^1 + (1 - \alpha)(I - \gamma_3 T_{a_0})^{-1}(I - \gamma_2 T_{a_0})(I - \gamma_1 T_a)v^1 \\ &= (I - \gamma_1 T_a)(I - \gamma_3 T_{a_0})^{-1}(\alpha(I - \gamma_1 T_{a_0}) + (1 - \alpha)(I - \gamma_2 T_{a_0}))v^1 \\ &= (I - \gamma_1 T_a)v^1. \end{aligned}$$

714 Uniqueness of  $v^3$  is trivial since the matrices  $(I - \gamma_3 T_a)$  are invertible, which shows that condition (40)  
 715 holds.

716 **Counter-example when the commutativity constraint does not hold.** We now provide a simple  
 717 example showing that the required generalizability condition (12) does not always hold in the case  
 718 where the commutativity condition breaks. Suppose  $|\mathcal{S}| = 3$ ,  $|\mathcal{A}| = 2$  and

$$T_{a_1} = \begin{pmatrix} 0.5 & 0.2 & 0.3 \\ 0.3 & 0.5 & 0.2 \\ 0 & 0.5 & 0.5 \end{pmatrix}, \quad T_{a_2} = \begin{pmatrix} 0.3 & 0.4 & 0.3 \\ 0.7 & 0.1 & 0.2 \\ 0.4 & 0.1 & 0.5 \end{pmatrix}. \quad (41)$$

719 These matrices do not commute and we have for any discount factors  $\gamma_1, \gamma_2, \gamma_3$  all different,

$$4 = \text{rank} \begin{pmatrix} I - \gamma_1 T_{a_1} & I - \gamma_2 T_{a_1} \\ I - \gamma_1 T_{a_2} & I - \gamma_2 T_{a_2} \end{pmatrix} \neq \text{rank} \begin{pmatrix} I - \gamma_1 T_{a_1} & I - \gamma_2 T_{a_1} & \mathbf{0} \\ I - \gamma_1 T_{a_2} & I - \gamma_2 T_{a_2} & \mathbf{0} \\ I - \gamma_1 T_{a_1} & \mathbf{0} & I - \gamma_3 T_{a_1} \\ I - \gamma_1 T_{a_2} & \mathbf{0} & I - \gamma_3 T_{a_2} \end{pmatrix} - |\mathcal{S}| = 5. \quad (42)$$

## 720 B Algorithms details

721 This section provides the detailed pseudocode of the procedures we introduced for reward identifica-  
 722 tion (Algorithm 1), for generalizability (Algorithm 3) and identification when the reward function  
 can be expressed as linear combination of known features (Algorithm 2).

---

### Algorithm 1 Identifiability Test

---

**Input:** Expert transition matrices  $T_1, T_2$ , entropy-regularized optimal policies  $\pi_1, \pi_2$ .  
 Compute matrix

$$A := \begin{pmatrix} -(I - \gamma_1 T_{a_1}^1) & I - \gamma_2 T_{a_1}^2 \\ \vdots & \vdots \\ -(I - \gamma_1 T_{a_{|\mathcal{A}|}}^1) & I - \gamma_2 T_{a_{|\mathcal{A}|}}^2 \end{pmatrix} \quad (43)$$

**if**  $\text{rank}(A) = 2|\mathcal{S}| - 1$  **then**

Identifiable = True

Form vector  $b \in \mathbb{R}^{|\mathcal{S}||\mathcal{A}|}$  such that  $b(s, a) = \lambda \log \frac{\pi^1(a|s)}{\pi^2(a|s)}$  (ordered by states first)

Recover value vectors  $\begin{pmatrix} v^1 \\ v^2 \end{pmatrix} = (A^T A)^{-1} A^T b$

Recover the reward function as  $r(s, a) = \lambda \log \pi^1(a|s) + \gamma \sum_{s'} T_1(s'|s, a) v^1(s') - v^1(s)$  or  
 equivalently  $r(s, a) = \lambda \log \pi^2(a|s) + \gamma \sum_{s'} T_2(s'|s, a) v^2(s') - v^2(s)$

**else**

Identifiable = False

**end if**

**Output:** Identifiable and recovered reward  $r$ .

---



---

### Algorithm 2 Identifiability Test with linear reward function

---

**Input:** Expert transition matrices  $T^1, T^2$ , entropy-regularized optimal policies  $\pi_1, \pi_2$ , features set  
 $\{f_a\}_a$ .

Compute matrix

$$A := \begin{pmatrix} -(I - \gamma_1 T_{a_1}^1) & I - \gamma_2 T_{a_1}^2 & \mathbf{0} \\ \vdots & \vdots & \vdots \\ -(I - \gamma_1 T_{a_{|\mathcal{A}|}}^1) & I - \gamma_2 T_{a_{|\mathcal{A}|}}^2 & \mathbf{0} \\ -(I - \gamma_1 T_{a_1}^1) & \mathbf{0} & f_{a_1} \\ \vdots & \vdots & \vdots \\ -(I - \gamma_1 T_{a_{|\mathcal{A}|}}^1) & \mathbf{0} & f_{a_{|\mathcal{A}|}} \end{pmatrix} \quad (44)$$

**if**  $\text{rank}(A) = 2|\mathcal{S}| + d$  **then**

Identifiable = True

Form vectors  $b_1, b_2 \in \mathbb{R}^{|\mathcal{S}||\mathcal{A}|}$  defined as  $b_1(s, a) = \lambda \log \frac{\pi^1(a|s)}{\pi^2(a|s)}$ ,  $b_2(s, a) = \lambda \log \pi^1(a|s)$  and

$b \in \mathbb{R}^{2|\mathcal{S}||\mathcal{A}|}$  as  $b = \begin{pmatrix} b_1 \\ b_2 \end{pmatrix}$

Recover value vectors and reward weights  $\begin{pmatrix} v^1 \\ v^2 \\ \theta \end{pmatrix} = (A^T A)^{-1} A^T b$

Recover the reward function as  $r(s, a) = \theta^T f_{s,a}$

**else**

Identifiable = False

**end if**

**Output:** Identifiable and recovered reward  $r$ .

---

---

**Algorithm 3** Generalization Test
 

---

**Input:** Expert transition matrices  $T^1, T^2$ , transfer transition matrix  $T^3$ , entropy-regularized optimal policies  $\pi_1, \pi_2$ .  
 Compute matrix

$$A := \begin{pmatrix} -(I - \gamma_1 T_{a_1}^1) & I - \gamma_2 T_{a_1}^2 \\ \vdots & \vdots \\ -(I - \gamma_1 T_{a_{|\mathcal{A}|}}^1) & I - \gamma_2 T_{a_{|\mathcal{A}|}}^2 \end{pmatrix}$$

**if** the condition in Equation (12) holds **then**

Generalizable = True

Form vector  $b \in \mathbb{R}^{|\mathcal{S}||\mathcal{A}|}$  such that  $b(s, a) = \lambda \log \frac{\pi^1(a|s)}{\pi^2(a|s)}$

Recover the value vectors  $\begin{pmatrix} v^1 \\ v^2 \end{pmatrix} = (A^T A)^{-1} A^T b$

Recover the reward function as  $r(s, a) = \lambda \log \pi^1(a|s) + \gamma \sum_{s'} T_1(s'|s, a) v^1(s') - v^1(s)$

Recover the optimal entropy regularized policy  $\pi^3$  in  $T^3$  using the recovered reward  $r$  with any RL algorithm.

**else**

Generalizable = False

**end if**

**Output:** Generalizable and recovered policy  $\pi^3$ .

---

724 Algorithms 1 and 3 can be generalized to an arbitrary number of experts. Indeed, denoting the matrix  
 725 in Equation (43) as  $A_2$ , we can construct the matrix  $A_n$  for  $n$  experts recursively as follows:

$$A_n := \begin{pmatrix} A_{n-1} & \mathbf{0} \\ -(I - \gamma_1 T_{a_1}^1) & \mathbf{0} & I - \gamma_n T_{a_1}^n \\ \vdots & \vdots & \vdots \\ -(I - \gamma_1 T_{a_{|\mathcal{A}|}}^1) & \mathbf{0} & I - \gamma_n T_{a_{|\mathcal{A}|}}^n \end{pmatrix} \quad (45)$$

726 Similarly, we can construct the vector  $b_n$  as

$$b_n := \begin{pmatrix} b_{n-1} \\ \lambda \log \frac{\pi^1(a|s)}{\pi^n(a|s)} \end{pmatrix} \quad (46)$$

727 where  $b_1$  denotes the vector defined in the algorithms for 2 experts. The rest of the procedures remain  
 728 unchanged.

## 729 C Additional experiments

730 This section provides the experimental results and environment details omitted from the main text.

731 **Additional details for Gridworld** In the main text, we omitted the description of the reward  
 732 function. We provide it hereafter for completeness. The reward function is obtained assigning a value  
 733 at every state according to the grid shown in Figure 5. This reward function would depend only on  
 734 states. To obtain a state-action dependent reward function, we add a penalty of  $-30$  for moving right,  
 735  $-20$  for moving down,  $-10$  for moving left and  $0$  for a step upwards.

736 **Additional details for WindyGridworld** In WindyGridworld, the agent moves of one step ac-  
 737 cording to the next state sampled from  $T_\alpha(s'|s, a) = (1 - \alpha)T_{\text{det}}(s'|s, a) + \alpha U(s'|s, a)$  where  
 738  $T_{\text{det}}(s'|s, a)$  as in Gridworld. In addition to that the agent takes an additional step according to the  
 739 wind direction. The wind direction  $w$  is sampled from the wind distribution generated by sampling  
 740 each entry of the non normalized  $P_{\text{wind}}$  from a normal distribution and normalizing the obtained  
 741 vector. After sampling the wind direction we sample the corresponding next state from  $T_{\text{det}}(s'|s, w)$ .

742 The reward function is the same used for the environment Gridworld.



743 **Results on Random-Matrices** We report in Figure 4, the results omitted from the main text. In  
 744 Figure 4, we show the reward recovered with Algorithm 1 and the difference with respect to the true  
 745 reward. It clearly emerges that the recovered reward is within a constant shift from the true reward  
 746 function.

747 **Results on Gridworld with state only reward** We provide an additional result on Gridworld  
 748 where we do not consider the penalty assigned to the different actions. In this case, the reward  
 749 depends only on states but the learner is not informed about this feature. In Figure 5, we show the  
 750 recovered reward. Given that the reward depends only on the states we show the 2D representation of  
 751 the state space suppressing the action dimension.

752 **Results on WindyGridworld with different discount factors** In the main text we showed that we  
 753 need to observe 4 experts to generalize to a new wind distribution. Hereafter, we provide experiments  
 754 on the generalization to a new environment with a different discount factor. We verified that in this  
 755 case observing two experts is enough to generalize. The comparison between recovered rewards and  
 756 policies can be found in Figure 6.

**Computational resources** The experiment can be reproduced with a standard laptop.

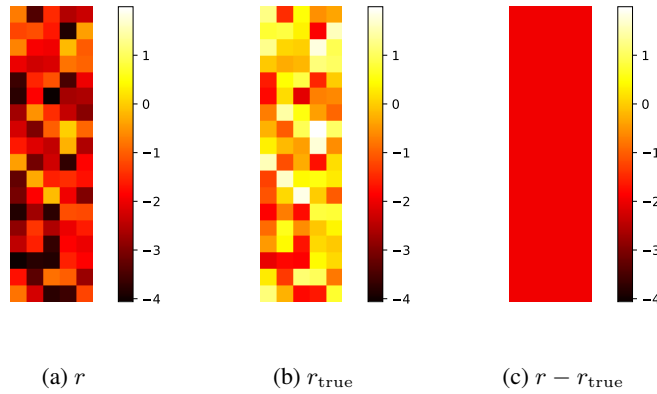

Figure 4: Comparison between true and recovered reward in Random-Matrices with  $|\mathcal{S}| = 18$  and  $|\mathcal{A}| = 5$ . On the vertical axis corresponds to the canonical ordering of the 18 states while the horizontal axis corresponds to the 5 actions.

757

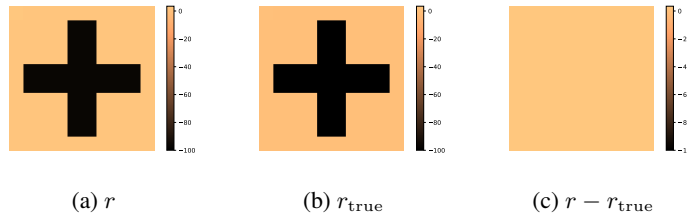

Figure 5: Comparison between true and recovered reward in Gridworld with  $|\mathcal{S}| = 100$  and the 4 actions up, down, left and right. It can be noticed that the reward function is recovered up to a constant shift.

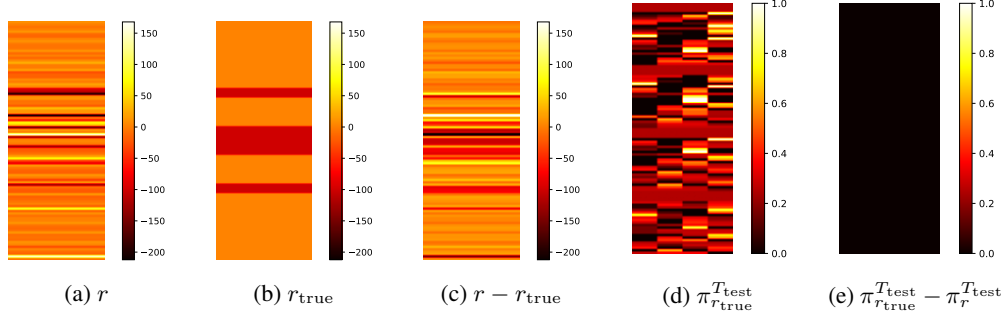

Figure 6: Generalization in WindyGridworld with different discount factors. We observe two experts with discounts factor  $\gamma_1$  and  $\gamma_2$  with  $\gamma_1 \neq \gamma_2$  and with common transition dynamics. Subplot (e) shows that the policy recovered from  $r_{\text{true}}$  in a new environment with a different  $\gamma_3$  matches the policy obtained from the recovered reward.

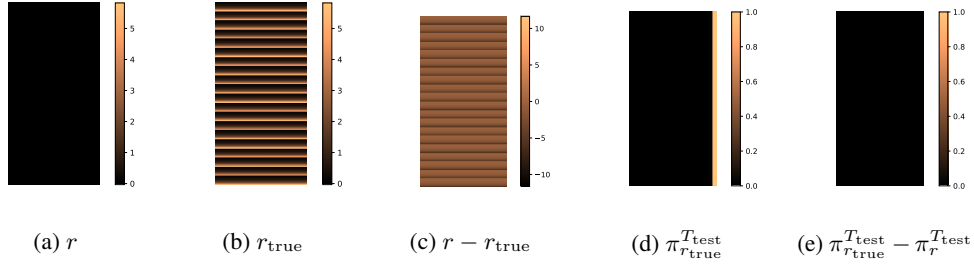

Figure 7: Comparison between true and recovered reward in Strebulae-Whited with  $|\mathcal{S}| = 400$  and the 20 actions. It can be clearly noticed that the reward function is not identified (see subplots (a), (b), (c)). However, when we use the recovered reward in subplot (a) to train an optimal policy under unseen dynamics we recover the optimal policy under the true reward in subplot (b). The subplots (d) show the policies recovered from the true reward and (e) shows the difference between the policy recovered from  $r_{\text{true}}$  and from the recovered reward.

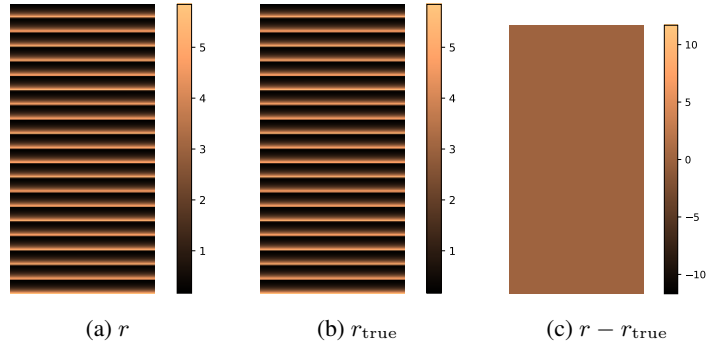

Figure 8: Comparison between true and recovered reward in Strebulae-Whited assuming additional knowledge of the features  $\{f_a\}_a$ . It emerges that thanks to such additional information the reward function is identifiable.
